# Supplementary material for: Transcriptome analysis of Phytophthora litchii reveals pathogenicity arsenals and confirms taxonomic status
Source: PLoS One. 2017 Jun 1;12(6):e0178245. doi: 10.1371/journal.pone.0178245 (PMC5453482; doi:10.1371/journal.pone.0178245)
Supplement: S1 Table — (XLSX) [file pone.0178245.s001.xlsx]

## Sheet: S1 Table
S1 Table. The KEGG pathway classfication of P. litchii
Pathway Hierarchy1	Pathway Hierarchy2	KEGG Pathway	Pathway ID	Gene Number	Gene IDs
Cellular Processes	Cell communication	Adherens junction	ko04520	51	Pli_4835_g1,Pli_1595_g1,Pli_5603_g1,Pli_5873_g1,Pli_5567_g1,Pli_724_g1,Pli_18353_g1,Pli_12785_g1,Pli_6789_g3,Pli_17098_g1,Pli_6789_g2,Pli_1637_g1,Pli_6789_g1,Pli_12518_g1,Pli_12559_g1,Pli_2522_g1,Pli_10663_g1,Pli_6240_g1,Pli_14466_g1,Pli_1856_g1,Pli_21227_g1,Pli_14480_g1,Pli_760_g1,Pli_7615_g1,Pli_589_g2,Pli_14430_g1,Pli_3158_g1,Pli_1249_g1,Pli_833_g1,Pli_10619_g1,Pli_14174_g1,Pli_17985_g1,Pli_21…
Cellular Processes	Cell communication	Focal adhesion	ko04510	103	Pli_6848_g2,Pli_16702_g1,Pli_5077_g1,Pli_16892_g1,Pli_1194_g1,Pli_22524_g1,Pli_12936_g1,Pli_2966_g1,Pli_17810_g1,Pli_14480_g1,Pli_21227_g1,Pli_22471_g1,Pli_7765_g1,Pli_10447_g1,Pli_1249_g1,Pli_19368_g1,Pli_9729_g1,Pli_146_g1,Pli_19800_g1,Pli_9643_g1,Pli_19857_g1,Pli_12608_g1,Pli_18769_g1,Pli_19772_g1,Pli_19640_g1,Pli_4247_g2,Pli_10314_g1,Pli_4719_g2,Pli_14577_g1,Pli_22548_g1,Pli_10017_g1,Pli_5019…
Cellular Processes	Cell communication	Gap junction	ko04540	51	Pli_21989_g1,Pli_1637_g1,Pli_10904_g1,Pli_12165_g1,Pli_2721_g1,Pli_4439_g2,Pli_3111_g1,Pli_8624_g1,Pli_20168_g1,Pli_4440_g2,Pli_14076_g1,Pli_10552_g1,Pli_4454_g1,Pli_4439_g3,Pli_12213_g1,Pli_4339_g1,Pli_6240_g1,Pli_2522_g1,Pli_12559_g1,Pli_12518_g1,Pli_7065_g1,Pli_14694_g1,Pli_16592_g1,Pli_10307_g1,Pli_19053_g1,Pli_18646_g1,Pli_1194_g1,Pli_2144_g1,Pli_17985_g1,Pli_4884_g1,Pli_6375_g1,Pli_21728_g1…
Cellular Processes	Cell communication	Tight junction	ko04530	58	Pli_6055_g1,Pli_10017_g1,Pli_14274_g1,Pli_17883_g1,Pli_19772_g1,Pli_11563_g1,Pli_4439_g1,Pli_9341_g1,Pli_9643_g1,Pli_10083_g1,Pli_146_g1,Pli_15572_g1,Pli_17690_g1,Pli_1249_g1,Pli_21227_g1,Pli_612_g1,Pli_22471_g1,Pli_14480_g1,Pli_5286_g2,Pli_760_g1,Pli_15126_g1,Pli_12936_g1,Pli_7952_g1,Pli_2020_g1,Pli_12241_g1,Pli_16240_g1,Pli_6789_g1,Pli_9132_g1,Pli_13866_g1,Pli_15234_g1,Pli_7780_g1,Pli_4439_g3,P…
Cellular Processes	Cell growth and death	Apoptosis	ko04210	36	Pli_19267_g1,Pli_15663_g1,Pli_6970_g1,Pli_20881_g1,Pli_16000_g1,Pli_16429_g1,Pli_2020_g1,Pli_12532_g1,Pli_16370_g1,Pli_18646_g1,Pli_22471_g1,Pli_612_g1,Pli_269_g1,Pli_17690_g1,Pli_13911_g1,Pli_12716_g1,Pli_6414_g1,Pli_4454_g1,Pli_16764_g1,Pli_4962_g1,Pli_10259_g1,Pli_9523_g1,Pli_19678_g1,Pli_8624_g1,Pli_3296_g1,Pli_1289_g1,Pli_12165_g1,Pli_1340_g1,Pli_504_g1,Pli_11553_g1,Pli_1266_g1,Pli_8410_g1,P…
Cellular Processes	Cell growth and death	Cell cycle	ko04110	81	Pli_15364_g1,Pli_20450_g1,Pli_4258_g1,Pli_10447_g1,Pli_18974_g1,Pli_15716_g1,Pli_12721_g1,Pli_19395_g1,Pli_4094_g1,Pli_17355_g1,Pli_2572_g1,Pli_13107_g1,Pli_5936_g1,Pli_20741_g1,Pli_12195_g1,Pli_14587_g1,Pli_6736_g1,Pli_16541_g1,Pli_6911_g1,Pli_21_g1,Pli_22556_g1,Pli_17657_g1,Pli_2845_g1,Pli_5591_g1,Pli_7207_g1,Pli_4735_g1,Pli_7299_g1,Pli_8197_g1,Pli_12115_g1,Pli_15165_g1,Pli_14460_g1,Pli_17780_g…
Cellular Processes	Cell growth and death	Cell cycle - Caulobacter	ko04112	5	Pli_12597_g1,Pli_20825_g1,Pli_5247_g1,Pli_12552_g1,Pli_6663_g1
Cellular Processes	Cell growth and death	Cell cycle - yeast	ko04111	61	Pli_15870_g1,Pli_15716_g1,Pli_10418_g1,Pli_6805_g2,Pli_19395_g1,Pli_12721_g1,Pli_12241_g1,Pli_7453_g1,Pli_837_g1,Pli_5509_g1,Pli_18974_g1,Pli_1151_g1,Pli_21_g1,Pli_5747_g1,Pli_3793_g2,Pli_6304_g1,Pli_15180_g1,Pli_6301_g1,Pli_17657_g1,Pli_22556_g1,Pli_15534_g1,Pli_2845_g1,Pli_10083_g1,Pli_4473_g1,Pli_5936_g1,Pli_1431_g1,Pli_14555_g1,Pli_6055_g1,Pli_15304_g1,Pli_567_g1,Pli_5716_g1,Pli_17883_g1,Pli_…
Cellular Processes	Cell growth and death	Meiosis - yeast	ko04113	62	Pli_8624_g1,Pli_20192_g1,Pli_18539_g1,Pli_7299_g1,Pli_9992_g1,Pli_12165_g1,Pli_10911_g1,Pli_7207_g1,Pli_6093_g1,Pli_5721_g1,Pli_12286_g1,Pli_8662_g1,Pli_6055_g2,Pli_2733_g1,Pli_6707_g1,Pli_17780_g1,Pli_4454_g1,Pli_10933_g1,Pli_3828_g1,Pli_16384_g1,Pli_12446_g1,Pli_6942_g1,Pli_7574_g1,Pli_5066_g1,Pli_22545_g1,Pli_2033_g1,Pli_16702_g1,Pli_12241_g1,Pli_17810_g1,Pli_12721_g1,Pli_19395_g1,Pli_1180_g1,…
Cellular Processes	Cell growth and death	Oocyte meiosis	ko04114	101	Pli_21728_g1,Pli_269_g1,Pli_7615_g1,Pli_1816_g2,Pli_19053_g1,Pli_10418_g1,Pli_2026_g1,Pli_15870_g1,Pli_12241_g1,Pli_17985_g1,Pli_2144_g1,Pli_16429_g1,Pli_6055_g1,Pli_567_g1,Pli_21126_g1,Pli_1816_g1,Pli_7621_g1,Pli_14555_g1,Pli_1431_g1,Pli_4473_g1,Pli_6286_g1,Pli_6176_g1,Pli_5716_g1,Pli_6376_g1,Pli_15180_g1,Pli_1581_g1,Pli_3035_g1,Pli_6970_g1,Pli_15663_g1,Pli_5721_g1,Pli_12286_g1,Pli_7230_g1,Pli_4…
Cellular Processes	Cell growth and death	p53 signaling pathway	ko04115	25	Pli_6433_g2,Pli_20139_g1,Pli_15307_g1,Pli_4436_g1,Pli_10447_g1,Pli_16080_g1,Pli_19671_g1,Pli_20450_g1,Pli_4742_g1,Pli_12455_g1,Pli_1816_g2,Pli_1170_g1,Pli_5286_g2,Pli_5123_g1,Pli_15300_g1,Pli_16180_g1,Pli_19267_g1,Pli_146_g1,Pli_4742_g3,Pli_1597_g1,Pli_1816_g1,Pli_8197_g1,Pli_15234_g1,Pli_6793_g2,Pli_15165_g1
Cellular Processes	Cell motility	Regulation of actin cytoskeleton	ko04810	102	Pli_6789_g2,Pli_2721_g1,Pli_1637_g1,Pli_22045_g1,Pli_2407_g1,Pli_18465_g1,Pli_724_g1,Pli_12286_g1,Pli_6789_g3,Pli_17218_g1,Pli_6414_g1,Pli_2522_g1,Pli_12559_g1,Pli_7851_g1,Pli_13388_g1,Pli_9262_g1,Pli_18525_g1,Pli_10259_g1,Pli_7574_g1,Pli_4530_g1,Pli_22545_g1,Pli_5727_g1,Pli_11359_g1,Pli_12518_g1,Pli_20783_g1,Pli_17576_g1,Pli_17985_g1,Pli_2144_g1,Pli_21273_g1,Pli_19053_g1,Pli_760_g1,Pli_7615_g1,P…
Cellular Processes	Transport and catabolism	Endocytosis	ko04144	100	Pli_6858_g2,Pli_5325_g1,Pli_1332_g1,Pli_1216_g1,Pli_20138_g1,Pli_4778_g2,Pli_20645_g1,Pli_7088_g1,Pli_6432_g1,Pli_10237_g1,Pli_14163_g1,Pli_15504_g1,Pli_1756_g1,Pli_1937_g1,Pli_8078_g1,Pli_19184_g1,Pli_12259_g1,Pli_10667_g1,Pli_17473_g1,Pli_12595_g1,Pli_10990_g1,Pli_2336_g1,Pli_3921_g1,Pli_21683_g1,Pli_17455_g1,Pli_12341_g1,Pli_771_g1,Pli_4530_g1,Pli_5727_g1,Pli_6192_g1,Pli_8927_g1,Pli_12194_g1,P…
Cellular Processes	Transport and catabolism	Lysosome	ko04142	84	Pli_285_g1,Pli_21358_g1,Pli_1610_g1,Pli_20683_g1,Pli_10328_g1,Pli_11421_g1,Pli_713_g1,Pli_4059_g1,Pli_10084_g1,Pli_15482_g1,Pli_20355_g1,Pli_12866_g1,Pli_21836_g1,Pli_18546_g1,Pli_6146_g2,Pli_1376_g1,Pli_8779_g1,Pli_3960_g1,Pli_17710_g1,Pli_14364_g1,Pli_16391_g1,Pli_13716_g1,Pli_9190_g1,Pli_17019_g1,Pli_1376_g2,Pli_20786_g1,Pli_16981_g1,Pli_6155_g1,Pli_4599_g1,Pli_176_g1,Pli_19823_g1,Pli_13188_g1…
Cellular Processes	Transport and catabolism	Peroxisome	ko04146	68	Pli_20120_g1,Pli_19995_g1,Pli_12421_g1,Pli_4241_g1,Pli_12792_g1,Pli_7264_g1,Pli_7297_g1,Pli_12376_g1,Pli_6505_g1,Pli_2116_g2,Pli_10087_g1,Pli_10404_g1,Pli_1879_g1,Pli_2116_g1,Pli_12636_g1,Pli_20147_g1,Pli_15156_g1,Pli_58_g1,Pli_18441_g1,Pli_7515_g1,Pli_19960_g1,Pli_19563_g1,Pli_5569_g1,Pli_14032_g1,Pli_1136_g1,Pli_15329_g1,Pli_5563_g1,Pli_5614_g1,Pli_12777_g1,Pli_7015_g3,Pli_6145_g1,Pli_10490_g1,…
Cellular Processes	Transport and catabolism	Phagosome	ko04145	133	Pli_10307_g1,Pli_18778_g1,Pli_20662_g1,Pli_14694_g1,Pli_2041_g1,Pli_6789_g1,Pli_18109_g1,Pli_7521_g1,Pli_11750_g1,Pli_7503_g1,Pli_915_g1,Pli_14817_g1,Pli_1595_g1,Pli_4745_g3,Pli_4745_g2,Pli_21364_g1,Pli_14413_g1,Pli_15183_g1,Pli_4440_g2,Pli_20168_g1,Pli_13851_g1,Pli_15077_g1,Pli_6919_g1,Pli_10017_g1,Pli_1019_g1,Pli_12967_g1,Pli_9443_g1,Pli_3290_g1,Pli_12695_g1,Pli_9643_g1,Pli_12346_g1,Pli_10425_g…
Cellular Processes	Transport and catabolism	Regulation of autophagy	ko04140	18	Pli_15169_g1,Pli_12346_g1,Pli_5623_g1,Pli_21772_g1,Pli_1269_g2,Pli_20525_g1,Pli_740_g1,Pli_2776_g1,Pli_448_g1,Pli_2264_g1,Pli_2012_g1,Pli_22387_g1,Pli_7140_g1,Pli_20169_g1,Pli_6354_g1,Pli_5345_g1,Pli_5593_g1,Pli_15148_g1
Environmental Information Processing	Membrane transport	ABC transporters	ko02010	74	Pli_6965_g4,Pli_4152_g2,Pli_21409_g1,Pli_4307_g1,Pli_15565_g1,Pli_5464_g3,Pli_11708_g1,Pli_20197_g1,Pli_6965_g2,Pli_12491_g1,Pli_488_g1,Pli_6308_g1,Pli_5531_g1,Pli_8895_g1,Pli_11538_g1,Pli_20627_g1,Pli_1988_g1,Pli_6965_g3,Pli_20480_g1,Pli_12607_g1,Pli_21783_g1,Pli_18026_g1,Pli_922_g1,Pli_13343_g1,Pli_854_g1,Pli_6965_g1,Pli_14936_g1,Pli_4044_g1,Pli_2833_g1,Pli_5483_g1,Pli_11494_g1,Pli_6975_g1,Pli_…
Environmental Information Processing	Membrane transport	Bacterial secretion system	ko03070	2	Pli_5449_g1,Pli_7191_g1
Environmental Information Processing	Signal transduction	Calcium signaling pathway	ko04020	60	Pli_15472_g1,Pli_6457_g1,Pli_1174_g1,Pli_4962_g1,Pli_11346_g1,Pli_4682_g2,Pli_4454_g1,Pli_9596_g1,Pli_20898_g1,Pli_9102_g1,Pli_5203_g1,Pli_14678_g1,Pli_5740_g3,Pli_7558_g1,Pli_8520_g1,Pli_7307_g1,Pli_717_g1,Pli_14185_g1,Pli_5740_g2,Pli_11826_g1,Pli_4507_g1,Pli_10443_g1,Pli_9298_g1,Pli_15186_g1,Pli_12165_g1,Pli_11585_g1,Pli_19536_g1,Pli_5740_g1,Pli_8624_g1,Pli_3111_g1,Pli_3647_g1,Pli_18938_g1,Pli_…
Environmental Information Processing	Signal transduction	ErbB signaling pathway	ko04012	54	Pli_1194_g1,Pli_1755_g1,Pli_19053_g1,Pli_17985_g1,Pli_4167_g1,Pli_2020_g1,Pli_2144_g1,Pli_7031_g1,Pli_7765_g1,Pli_17690_g1,Pli_12569_g1,Pli_21728_g1,Pli_22471_g1,Pli_612_g1,Pli_15559_g1,Pli_17708_g1,Pli_7615_g1,Pli_4691_g1,Pli_3438_g1,Pli_19857_g1,Pli_12608_g1,Pli_6136_g1,Pli_1218_g1,Pli_5798_g1,Pli_5019_g1,Pli_6376_g1,Pli_14875_g1,Pli_6286_g1,Pli_17514_g1,Pli_2721_g1,Pli_1637_g1,Pli_504_g1,Pli_1…
Environmental Information Processing	Signal transduction	FoxO signaling pathway	ko04068	85	Pli_19857_g1,Pli_12608_g1,Pli_8916_g1,Pli_7257_g1,Pli_146_g1,Pli_18533_g1,Pli_5011_g1,Pli_1218_g1,Pli_5798_g1,Pli_5019_g1,Pli_6736_g1,Pli_1269_g2,Pli_14238_g1,Pli_1194_g1,Pli_6848_g2,Pli_5077_g1,Pli_4908_g2,Pli_2572_g1,Pli_22387_g1,Pli_20450_g1,Pli_7765_g1,Pli_3396_g1,Pli_10447_g1,Pli_15148_g1,Pli_22471_g1,Pli_3277_g1,Pli_6240_g1,Pli_8197_g1,Pli_3717_g1,Pli_18520_g1,Pli_15165_g1,Pli_6354_g1,Pli_5…
Environmental Information Processing	Signal transduction	HIF-1 signaling pathway	ko04066	94	Pli_9897_g1,Pli_5832_g2,Pli_10243_g1,Pli_6240_g1,Pli_16764_g1,Pli_13_g2,Pli_12115_g1,Pli_1420_g1,Pli_17685_g1,Pli_13_g1,Pli_1340_g1,Pli_7248_g1,Pli_17486_g1,Pli_1272_g1,Pli_14413_g1,Pli_538_g1,Pli_1301_g1,Pli_6136_g1,Pli_12608_g1,Pli_17076_g1,Pli_18017_g1,Pli_1828_g2,Pli_17514_g1,Pli_5396_g1,Pli_3290_g1,Pli_1218_g1,Pli_5019_g1,Pli_5798_g1,Pli_13526_g1,Pli_1019_g1,Pli_12557_g1,Pli_14993_g1,Pli_713…
Environmental Information Processing	Signal transduction	Hedgehog signaling pathway	ko04340	14	Pli_14806_g1,Pli_15824_g1,Pli_18495_g1,Pli_269_g1,Pli_16429_g1,Pli_15051_g1,Pli_7272_g1,Pli_3650_g1,Pli_15663_g1,Pli_8624_g1,Pli_18646_g1,Pli_12165_g1,Pli_4454_g1,Pli_19356_g1
Environmental Information Processing	Signal transduction	Hippo signaling pathway	ko04390	52	Pli_8374_g1,Pli_6789_g2,Pli_20192_g1,Pli_1956_g1,Pli_16080_g1,Pli_7230_g1,Pli_6055_g2,Pli_12286_g1,Pli_6789_g3,Pli_4368_g1,Pli_1595_g1,Pli_8818_g1,Pli_2407_g1,Pli_14466_g1,Pli_10949_g1,Pli_16284_g1,Pli_6789_g1,Pli_7272_g1,Pli_22545_g1,Pli_14460_g1,Pli_7574_g1,Pli_3828_g1,Pli_589_g1,Pli_17810_g1,Pli_12936_g1,Pli_1296_g1,Pli_12241_g1,Pli_16240_g1,Pli_16702_g1,Pli_17355_g1,Pli_10447_g1,Pli_7453_g1,P…
Environmental Information Processing	Signal transduction	Hippo signaling pathway -fly	ko04391	31	Pli_5747_g1,Pli_14601_g1,Pli_10083_g1,Pli_9643_g1,Pli_6055_g1,Pli_6789_g1,Pli_16284_g1,Pli_10017_g1,Pli_14460_g1,Pli_14274_g1,Pli_16541_g1,Pli_19772_g1,Pli_14587_g1,Pli_17883_g1,Pli_6789_g2,Pli_20192_g1,Pli_12936_g1,Pli_12241_g1,Pli_1296_g1,Pli_17355_g1,Pli_16240_g1,Pli_6789_g3,Pli_6055_g2,Pli_7230_g1,Pli_4368_g1,Pli_7453_g1,Pli_1595_g1,Pli_4709_g1,Pli_8818_g1,Pli_21227_g1,Pli_8528_g1
Environmental Information Processing	Signal transduction	Jak-STAT signaling pathway	ko04630	33	Pli_10259_g1,Pli_16896_g1,Pli_10541_g1,Pli_6414_g1,Pli_1266_g1,Pli_5603_g1,Pli_18353_g1,Pli_16080_g1,Pli_5567_g1,Pli_5873_g1,Pli_538_g1,Pli_22487_g1,Pli_8960_g1,Pli_3296_g1,Pli_10945_g1,Pli_1340_g1,Pli_504_g1,Pli_19906_g1,Pli_9304_g1,Pli_20896_g1,Pli_19857_g1,Pli_612_g1,Pli_22471_g1,Pli_19509_g1,Pli_16653_g1,Pli_17690_g1,Pli_5645_g2,Pli_10447_g1,Pli_2020_g1,Pli_14174_g1,Pli_833_g1,Pli_12075_g1,Pl…
Environmental Information Processing	Signal transduction	MAPK signaling pathway	ko04010	126	Pli_22031_g1,Pli_5019_g1,Pli_1218_g1,Pli_5798_g1,Pli_17134_g1,Pli_1011_g1,Pli_20516_g1,Pli_14577_g1,Pli_18867_g1,Pli_4247_g2,Pli_10314_g1,Pli_19857_g1,Pli_1430_g1,Pli_12608_g1,Pli_18769_g1,Pli_4699_g1,Pli_19368_g1,Pli_19267_g1,Pli_17223_g1,Pli_4111_g1,Pli_18533_g1,Pli_19800_g1,Pli_21557_g1,Pli_7765_g1,Pli_9912_g1,Pli_9352_g1,Pli_22471_g1,Pli_11262_g1,Pli_9585_g1,Pli_4709_g1,Pli_1194_g1,Pli_18646_…
Environmental Information Processing	Signal transduction	MAPK signaling pathway - fly	ko04013	20	Pli_1637_g1,Pli_3500_g1,Pli_19053_g1,Pli_1194_g1,Pli_2144_g1,Pli_17985_g1,Pli_21728_g1,Pli_7765_g1,Pli_7615_g1,Pli_12608_g1,Pli_6240_g1,Pli_19857_g1,Pli_12559_g1,Pli_2522_g1,Pli_12518_g1,Pli_5019_g1,Pli_1218_g1,Pli_5798_g1,Pli_6286_g1,Pli_6376_g1
Environmental Information Processing	Signal transduction	MAPK signaling pathway - yeast	ko04011	3	Pli_1856_g1,Pli_17098_g1,Pli_11461_g1
Environmental Information Processing	Signal transduction	NF-kappa B signaling pathway	ko04064	22	Pli_11553_g1,Pli_12954_g1,Pli_16370_g1,Pli_1289_g1,Pli_12869_g1,Pli_10619_g1,Pli_3479_g1,Pli_22236_g1,Pli_12785_g1,Pli_4024_g1,Pli_4835_g1,Pli_22468_g1,Pli_16764_g1,Pli_18921_g1,Pli_9596_g1,Pli_13911_g1,Pli_6053_g1,Pli_10663_g1,Pli_11276_g1,Pli_19678_g1,Pli_9523_g1,Pli_19378_g1
Environmental Information Processing	Signal transduction	Notch signaling pathway	ko04330	16	Pli_9289_g1,Pli_22376_g1,Pli_14867_g1,Pli_20033_g1,Pli_7862_g1,Pli_4674_g1,Pli_12427_g1,Pli_833_g1,Pli_4735_g1,Pli_9951_g1,Pli_5603_g1,Pli_4520_g1,Pli_5567_g1,Pli_5873_g1,Pli_13109_g1,Pli_4258_g1
Environmental Information Processing	Signal transduction	PI3K-Akt signaling pathway	ko04151	157	Pli_3296_g1,Pli_5410_g1,Pli_20139_g1,Pli_12710_g1,Pli_1637_g1,Pli_6433_g2,Pli_20192_g1,Pli_2721_g1,Pli_13690_g1,Pli_8818_g1,Pli_4368_g1,Pli_6414_g1,Pli_12559_g1,Pli_16234_g1,Pli_6793_g2,Pli_9484_g1,Pli_16284_g1,Pli_9523_g1,Pli_897_g1,Pli_2020_g1,Pli_4167_g1,Pli_12241_g1,Pli_1535_g1,Pli_22486_g1,Pli_19053_g1,Pli_4691_g1,Pli_7615_g1,Pli_1816_g2,Pli_612_g1,Pli_4909_g1,Pli_17863_g1,Pli_21043_g1,Pli_1…
Environmental Information Processing	Signal transduction	Phosphatidylinositol signaling system	ko04070	59	Pli_20169_g1,Pli_14287_g1,Pli_6241_g1,Pli_19601_g1,Pli_2026_g1,Pli_17250_g1,Pli_5286_g2,Pli_4536_g1,Pli_13777_g1,Pli_5036_g1,Pli_6222_g1,Pli_2528_g1,Pli_18159_g1,Pli_18216_g1,Pli_15137_g1,Pli_20163_g1,Pli_4611_g1,Pli_5748_g1,Pli_146_g1,Pli_4630_g1,Pli_9570_g1,Pli_5225_g1,Pli_12346_g1,Pli_14866_g1,Pli_21197_g1,Pli_7014_g1,Pli_15254_g1,Pli_3111_g1,Pli_2142_g1,Pli_10274_g1,Pli_18938_g1,Pli_3647_g1,P…
Environmental Information Processing	Signal transduction	Plant hormone signal transduction	ko04075	19	Pli_17799_g1,Pli_2017_g1,Pli_1824_g1,Pli_6569_g1,Pli_10463_g1,Pli_115_g1,Pli_17325_g1,Pli_20378_g1,Pli_18226_g1,Pli_13267_g1,Pli_11018_g1,Pli_3468_g1,Pli_21445_g1,Pli_6150_g1,Pli_12811_g1,Pli_5397_g1,Pli_6914_g1,Pli_18023_g1,Pli_15774_g1
Environmental Information Processing	Signal transduction	Rap1 signaling pathway	ko04015	79	Pli_9734_g1,Pli_6789_g2,Pli_2721_g1,Pli_1637_g1,Pli_504_g1,Pli_3296_g1,Pli_3647_g1,Pli_18938_g1,Pli_6789_g3,Pli_1956_g1,Pli_2407_g1,Pli_1266_g1,Pli_12544_g1,Pli_14466_g1,Pli_18525_g1,Pli_2522_g1,Pli_6414_g1,Pli_12559_g1,Pli_12518_g1,Pli_20032_g1,Pli_10259_g1,Pli_2026_g1,Pli_19053_g1,Pli_2144_g1,Pli_2020_g1,Pli_17985_g1,Pli_9620_g1,Pli_17690_g1,Pli_21728_g1,Pli_612_g1,Pli_7615_g1,Pli_9175_g1,Pli_1…
Environmental Information Processing	Signal transduction	Ras signaling pathway	ko04014	72	Pli_19800_g1,Pli_18533_g1,Pli_12608_g1,Pli_19857_g1,Pli_4247_g2,Pli_1011_g1,Pli_21197_g1,Pli_5798_g1,Pli_1218_g1,Pli_5019_g1,Pli_9443_g1,Pli_18646_g1,Pli_1194_g1,Pli_20978_g1,Pli_9585_g1,Pli_13777_g1,Pli_22471_g1,Pli_12686_g1,Pli_7765_g1,Pli_1856_g1,Pli_9294_g1,Pli_16764_g1,Pli_6240_g1,Pli_8624_g1,Pli_20109_g1,Pli_1340_g1,Pli_12165_g1,Pli_17098_g1,Pli_538_g1,Pli_277_g1,Pli_2493_g1,Pli_717_g1,Pli_…
Environmental Information Processing	Signal transduction	TGF-beta signaling pathway	ko04350	52	Pli_10083_g1,Pli_12608_g1,Pli_14875_g1,Pli_6376_g1,Pli_6286_g1,Pli_1431_g1,Pli_1218_g1,Pli_6055_g1,Pli_5798_g1,Pli_5019_g1,Pli_20510_g1,Pli_833_g1,Pli_4167_g1,Pli_12241_g1,Pli_2144_g1,Pli_17985_g1,Pli_19902_g1,Pli_1194_g1,Pli_15870_g1,Pli_1755_g1,Pli_10418_g1,Pli_3465_g1,Pli_7615_g1,Pli_4691_g1,Pli_3438_g1,Pli_12569_g1,Pli_5832_g2,Pli_12559_g1,Pli_2522_g1,Pli_5197_g1,Pli_6240_g1,Pli_1420_g1,Pli_2…
Environmental Information Processing	Signal transduction	TNF signaling pathway	ko04668	38	Pli_7615_g1,Pli_612_g1,Pli_22471_g1,Pli_21728_g1,Pli_17690_g1,Pli_7765_g1,Pli_2020_g1,Pli_2144_g1,Pli_17985_g1,Pli_10619_g1,Pli_2336_g1,Pli_19053_g1,Pli_1194_g1,Pli_6286_g1,Pli_6376_g1,Pli_1218_g1,Pli_5019_g1,Pli_5798_g1,Pli_19267_g1,Pli_12608_g1,Pli_1266_g1,Pli_538_g1,Pli_3296_g1,Pli_4325_g1,Pli_1340_g1,Pli_1637_g1,Pli_504_g1,Pli_10259_g1,Pli_19678_g1,Pli_9523_g1,Pli_12518_g1,Pli_13911_g1,Pli_10…
Environmental Information Processing	Signal transduction	Two-component system	ko02020	12	Pli_5006_g1,Pli_22483_g1,Pli_14369_g1,Pli_3968_g1,Pli_5470_g1,Pli_17254_g1,Pli_684_g1,Pli_10046_g1,Pli_7240_g1,Pli_12455_g1,Pli_6104_g1,Pli_7256_g1
Environmental Information Processing	Signal transduction	VEGF signaling pathway	ko04370	43	Pli_1218_g1,Pli_5798_g1,Pli_5019_g1,Pli_14896_g1,Pli_4247_g2,Pli_6286_g1,Pli_4719_g2,Pli_3512_g1,Pli_6376_g1,Pli_12608_g1,Pli_6970_g1,Pli_19800_g1,Pli_17690_g1,Pli_14624_g1,Pli_21728_g1,Pli_7765_g1,Pli_7615_g1,Pli_20151_g1,Pli_612_g1,Pli_22471_g1,Pli_19053_g1,Pli_1194_g1,Pli_2144_g1,Pli_2020_g1,Pli_17985_g1,Pli_12518_g1,Pli_4962_g1,Pli_10259_g1,Pli_1856_g1,Pli_6240_g1,Pli_12559_g1,Pli_2522_g1,Pli…
Environmental Information Processing	Signal transduction	Wnt signaling pathway	ko04310	51	Pli_12165_g1,Pli_17536_g1,Pli_17098_g1,Pli_8624_g1,Pli_16080_g1,Pli_12785_g1,Pli_5873_g1,Pli_5567_g1,Pli_8520_g1,Pli_7558_g1,Pli_5603_g1,Pli_10443_g1,Pli_4835_g1,Pli_8519_g1,Pli_22376_g1,Pli_4454_g1,Pli_14466_g1,Pli_5197_g1,Pli_10663_g1,Pli_18133_g1,Pli_6847_g1,Pli_6187_g2,Pli_7272_g1,Pli_12427_g1,Pli_4674_g1,Pli_12115_g1,Pli_4962_g1,Pli_14806_g1,Pli_14867_g1,Pli_18646_g1,Pli_10418_g1,Pli_589_g1,…
Environmental Information Processing	Signal transduction	mTOR signaling pathway	ko04150	76	Pli_1269_g2,Pli_740_g1,Pli_2220_g1,Pli_1218_g1,Pli_5798_g1,Pli_5019_g1,Pli_5011_g1,Pli_13526_g1,Pli_146_g1,Pli_6136_g1,Pli_12608_g1,Pli_3438_g1,Pli_22471_g1,Pli_7031_g1,Pli_22387_g1,Pli_6848_g2,Pli_5077_g1,Pli_7139_g1,Pli_14017_g1,Pli_1194_g1,Pli_1420_g1,Pli_18520_g1,Pli_17685_g1,Pli_5832_g2,Pli_9522_g1,Pli_6240_g1,Pli_17486_g1,Pli_4201_g1,Pli_538_g1,Pli_8944_g1,Pli_1340_g1,Pli_6354_g1,Pli_4351_g…
Environmental Information Processing	Signaling molecules and interaction	Cell adhesion molecules (CAMs)	ko04514	17	Pli_21402_g1,Pli_16640_g1,Pli_2407_g1,Pli_11859_g1,Pli_11622_g1,Pli_6096_g1,Pli_2664_g1,Pli_9620_g1,Pli_22082_g1,Pli_1756_g1,Pli_17170_g1,Pli_18525_g1,Pli_13630_g1,Pli_19640_g1,Pli_18778_g1,Pli_7088_g1,Pli_6919_g1
Environmental Information Processing	Signaling molecules and interaction	Cytokine-cytokine receptor interaction	ko04060	10	Pli_4325_g1,Pli_8960_g1,Pli_19267_g1,Pli_3707_g2,Pli_6053_g1,Pli_3479_g1,Pli_3707_g1,Pli_21574_g1,Pli_3103_g1,Pli_16653_g1
Environmental Information Processing	Signaling molecules and interaction	ECM-receptor interaction	ko04512	13	Pli_9437_g1,Pli_22548_g1,Pli_773_g1,Pli_6383_g1,Pli_19640_g1,Pli_4909_g1,Pli_2966_g1,Pli_18525_g1,Pli_1541_g1,Pli_11100_g1,Pli_19382_g1,Pli_16892_g1,Pli_14317_g1
Environmental Information Processing	Signaling molecules and interaction	Neuroactive ligand-receptor interaction	ko04080	3	Pli_19706_g1,Pli_9632_g1,Pli_6153_g1
Genetic Information Processing	Folding, sorting and degradation	Proteasome	ko03050	50	Pli_9059_g1,Pli_18098_g1,Pli_12690_g1,Pli_7479_g1,Pli_20871_g1,Pli_15503_g1,Pli_17805_g1,Pli_19621_g1,Pli_14809_g1,Pli_19870_g1,Pli_10254_g1,Pli_9947_g1,Pli_13249_g1,Pli_1993_g1,Pli_12638_g1,Pli_20152_g1,Pli_8109_g1,Pli_20506_g1,Pli_17766_g1,Pli_10130_g1,Pli_12835_g1,Pli_14904_g1,Pli_20252_g1,Pli_7394_g1,Pli_1682_g1,Pli_7551_g1,Pli_18269_g1,Pli_11434_g1,Pli_379_g1,Pli_15005_g1,Pli_379_g2,Pli_2191…
Genetic Information Processing	Folding, sorting and degradation	Protein export	ko03060	21	Pli_17522_g1,Pli_11896_g1,Pli_20214_g1,Pli_17734_g1,Pli_18387_g1,Pli_16206_g1,Pli_22437_g1,Pli_613_g1,Pli_106_g1,Pli_11562_g1,Pli_17487_g1,Pli_22163_g1,Pli_7457_g1,Pli_106_g2,Pli_7191_g1,Pli_17804_g1,Pli_16707_g1,Pli_2676_g2,Pli_5449_g1,Pli_14383_g1,Pli_20807_g1
Genetic Information Processing	Folding, sorting and degradation	Protein processing in endoplasmic reticulum	ko04141	162	Pli_4249_g1,Pli_835_g1,Pli_15237_g1,Pli_21781_g1,Pli_9484_g1,Pli_17813_g1,Pli_18133_g1,Pli_4320_g1,Pli_1183_g1,Pli_2298_g1,Pli_12746_g1,Pli_21956_g1,Pli_12262_g1,Pli_20622_g1,Pli_14641_g1,Pli_16707_g1,Pli_13286_g1,Pli_14359_g1,Pli_9773_g1,Pli_18829_g1,Pli_10139_g1,Pli_16417_g1,Pli_3557_g1,Pli_14923_g1,Pli_494_g2,Pli_17455_g1,Pli_14922_g1,Pli_6769_g1,Pli_690_g1,Pli_12290_g1,Pli_19184_g1,Pli_9212_g…
Genetic Information Processing	Folding, sorting and degradation	RNA degradation	ko03018	53	Pli_13007_g1,Pli_10151_g1,Pli_13189_g1,Pli_4079_g1,Pli_20415_g1,Pli_3781_g1,Pli_9878_g1,Pli_17585_g1,Pli_2062_g2,Pli_12557_g1,Pli_14993_g1,Pli_3974_g1,Pli_19240_g1,Pli_9785_g1,Pli_13184_g1,Pli_1696_g1,Pli_21991_g1,Pli_18780_g1,Pli_3679_g1,Pli_4596_g2,Pli_12824_g1,Pli_20068_g1,Pli_20490_g1,Pli_15118_g1,Pli_3069_g1,Pli_166_g1,Pli_1371_g1,Pli_906_g1,Pli_7160_g1,Pli_13768_g1,Pli_4004_g1,Pli_7753_g1,P…
Genetic Information Processing	Folding, sorting and degradation	SNARE interactions in vesicular transport	ko04130	9	Pli_20234_g1,Pli_11877_g1,Pli_17499_g1,Pli_7521_g1,Pli_2969_g1,Pli_15665_g1,Pli_4568_g1,Pli_1721_g1,Pli_11064_g1
Genetic Information Processing	Folding, sorting and degradation	Sulfur relay system	ko04122	7	Pli_12529_g1,Pli_6518_g1,Pli_18316_g1,Pli_19892_g1,Pli_5089_g1,Pli_1385_g1,Pli_3267_g1
Genetic Information Processing	Folding, sorting and degradation	Ubiquitin mediated proteolysis	ko04120	93	Pli_6186_g1,Pli_15203_g1,Pli_12920_g1,Pli_17686_g1,Pli_16316_g1,Pli_12071_g1,Pli_4926_g1,Pli_4067_g1,Pli_21961_g1,Pli_12115_g1,Pli_16317_g1,Pli_14262_g1,Pli_18921_g1,Pli_9930_g1,Pli_6645_g1,Pli_6328_g1,Pli_3465_g1,Pli_1067_g1,Pli_5108_g1,Pli_14580_g1,Pli_12793_g1,Pli_1886_g1,Pli_4311_g1,Pli_2572_g1,Pli_5920_g1,Pli_3832_g1,Pli_12721_g1,Pli_21616_g1,Pli_15307_g1,Pli_20416_g1,Pli_1747_g1,Pli_5521_g1…
Genetic Information Processing	Replication and repair	Base excision repair	ko03410	19	Pli_10349_g1,Pli_9964_g1,Pli_6532_g1,Pli_13831_g1,Pli_15369_g1,Pli_20741_g1,Pli_4468_g1,Pli_5943_g1,Pli_6666_g1,Pli_6342_g1,Pli_2950_g1,Pli_5146_g1,Pli_9706_g1,Pli_15545_g1,Pli_7655_g1,Pli_20055_g1,Pli_5398_g1,Pli_3985_g1,Pli_6266_g1
Genetic Information Processing	Replication and repair	DNA replication	ko03030	27	Pli_3932_g1,Pli_5936_g1,Pli_8191_g1,Pli_8448_g1,Pli_20741_g1,Pli_10349_g1,Pli_6112_g1,Pli_9964_g1,Pli_6532_g1,Pli_1658_g1,Pli_13831_g1,Pli_21_g1,Pli_17780_g1,Pli_9706_g1,Pli_3487_g1,Pli_15534_g1,Pli_4468_g1,Pli_5490_g1,Pli_1710_g1,Pli_7207_g1,Pli_3985_g1,Pli_6805_g2,Pli_15669_g1,Pli_10070_g1,Pli_6266_g1,Pli_7655_g1,Pli_14856_g1
Genetic Information Processing	Replication and repair	Fanconi anemia pathway	ko03460	28	Pli_5579_g1,Pli_5123_g1,Pli_6819_g1,Pli_15230_g1,Pli_6590_g1,Pli_6182_g1,Pli_3273_g1,Pli_4531_g1,Pli_4502_g1,Pli_5709_g1,Pli_20359_g1,Pli_6394_g1,Pli_3995_g1,Pli_2597_g1,Pli_3487_g1,Pli_15900_g1,Pli_4910_g1,Pli_12986_g1,Pli_10339_g1,Pli_1710_g1,Pli_7006_g1,Pli_14222_g1,Pli_6221_g1,Pli_6516_g1,Pli_7538_g1,Pli_20517_g1,Pli_5144_g1,Pli_13015_g1
Genetic Information Processing	Replication and repair	Homologous recombination	ko03440	23	Pli_50_g1,Pli_15230_g1,Pli_18513_g1,Pli_6182_g1,Pli_549_g1,Pli_4531_g1,Pli_4468_g1,Pli_341_g1,Pli_3995_g1,Pli_3487_g1,Pli_6340_g1,Pli_9964_g1,Pli_22135_g1,Pli_6516_g1,Pli_20517_g1,Pli_5144_g1,Pli_7655_g1,Pli_4910_g1,Pli_5707_g1,Pli_10339_g1,Pli_10796_g1,Pli_1710_g1,Pli_8258_g1
Genetic Information Processing	Replication and repair	Mismatch repair	ko03430	17	Pli_3487_g1,Pli_306_g1,Pli_9706_g1,Pli_9964_g1,Pli_2214_g1,Pli_1658_g1,Pli_20741_g1,Pli_8448_g1,Pli_7655_g1,Pli_20055_g1,Pli_17439_g1,Pli_2816_g1,Pli_10070_g1,Pli_3985_g1,Pli_6132_g1,Pli_1710_g1,Pli_15900_g1
Genetic Information Processing	Replication and repair	Non-homologous end-joining	ko03450	9	Pli_15576_g1,Pli_10349_g1,Pli_5707_g1,Pli_20055_g1,Pli_5832_g1,Pli_22135_g1,Pli_18513_g1,Pli_549_g1,Pli_2950_g1
Genetic Information Processing	Replication and repair	Nucleotide excision repair	ko03420	36	Pli_5305_g1,Pli_3985_g1,Pli_6266_g1,Pli_14262_g1,Pli_7181_g1,Pli_3487_g1,Pli_2597_g1,Pli_1435_g1,Pli_6948_g2,Pli_1414_g1,Pli_12115_g1,Pli_1658_g1,Pli_6532_g1,Pli_2253_g1,Pli_18485_g1,Pli_15119_g1,Pli_12917_g1,Pli_4238_g1,Pli_20055_g1,Pli_7655_g1,Pli_13015_g1,Pli_12581_g1,Pli_10418_g1,Pli_10070_g1,Pli_14644_g1,Pli_1710_g1,Pli_14580_g1,Pli_19078_g1,Pli_6056_g1,Pli_4468_g1,Pli_1200_g1,Pli_9706_g1,Pl…
Genetic Information Processing	Transcription	Basal transcription factors	ko03022	22	Pli_5106_g1,Pli_18134_g1,Pli_13399_g1,Pli_5305_g1,Pli_14014_g1,Pli_19078_g1,Pli_6056_g1,Pli_21095_g1,Pli_13124_g1,Pli_21596_g1,Pli_1414_g1,Pli_7181_g1,Pli_1435_g1,Pli_6948_g2,Pli_18927_g1,Pli_20352_g1,Pli_14951_g1,Pli_12917_g1,Pli_20223_g1,Pli_17839_g1,Pli_6082_g1,Pli_18485_g1
Genetic Information Processing	Transcription	RNA polymerase	ko03020	20	Pli_9817_g1,Pli_15400_g1,Pli_2139_g1,Pli_5753_g2,Pli_7670_g1,Pli_12679_g1,Pli_1367_g1,Pli_18013_g1,Pli_841_g1,Pli_7661_g1,Pli_8991_g1,Pli_5588_g1,Pli_9000_g1,Pli_11091_g1,Pli_1959_g1,Pli_19218_g1,Pli_5450_g1,Pli_15942_g1,Pli_13882_g1,Pli_954_g1
Genetic Information Processing	Transcription	Spliceosome	ko03040	143	Pli_15164_g1,Pli_6733_g1,Pli_15570_g1,Pli_4798_g3,Pli_15322_g1,Pli_17639_g1,Pli_7577_g1,Pli_15787_g1,Pli_15418_g1,Pli_12677_g1,Pli_1672_g1,Pli_20367_g1,Pli_22511_g1,Pli_4261_g3,Pli_4768_g1,Pli_17618_g1,Pli_21784_g1,Pli_2392_g1,Pli_4261_g1,Pli_12315_g1,Pli_3763_g1,Pli_14211_g1,Pli_16554_g1,Pli_20571_g1,Pli_4457_g1,Pli_7087_g2,Pli_12341_g1,Pli_5966_g1,Pli_3477_g2,Pli_21846_g1,Pli_427_g1,Pli_7564_g1…
Genetic Information Processing	Translation	Aminoacyl-tRNA biosynthesis	ko00970	48	Pli_13307_g1,Pli_18079_g1,Pli_15415_g1,Pli_15110_g1,Pli_20519_g1,Pli_9813_g1,Pli_15101_g1,Pli_15479_g1,Pli_5487_g2,Pli_15095_g1,Pli_4522_g1,Pli_15179_g1,Pli_3255_g1,Pli_4987_g1,Pli_2792_g1,Pli_5417_g1,Pli_12090_g1,Pli_20692_g1,Pli_3711_g1,Pli_3998_g1,Pli_12403_g1,Pli_22568_g1,Pli_20390_g1,Pli_6366_g1,Pli_20204_g1,Pli_20419_g1,Pli_2876_g1,Pli_4574_g1,Pli_2872_g1,Pli_2356_g1,Pli_51_g1,Pli_16544_g1,…
Genetic Information Processing	Translation	RNA transport	ko03013	113	Pli_4595_g1,Pli_20850_g1,Pli_20976_g1,Pli_14388_g1,Pli_13117_g1,Pli_21146_g1,Pli_6985_g1,Pli_22511_g1,Pli_20127_g1,Pli_6287_g2,Pli_8432_g1,Pli_17061_g1,Pli_10844_g1,Pli_1219_g1,Pli_3043_g1,Pli_20543_g1,Pli_3499_g1,Pli_4252_g2,Pli_237_g1,Pli_18706_g1,Pli_18761_g1,Pli_13768_g1,Pli_16234_g1,Pli_5831_g1,Pli_3297_g1,Pli_4022_g1,Pli_18559_g1,Pli_20295_g1,Pli_3069_g1,Pli_10067_g1,Pli_4702_g1,Pli_7275_g1…
Genetic Information Processing	Translation	Ribosome	ko03010	225	Pli_9380_g1,Pli_14845_g1,Pli_16463_g1,Pli_15816_g1,Pli_17518_g1,Pli_20123_g1,Pli_3558_g1,Pli_19737_g1,Pli_11537_g1,Pli_11879_g1,Pli_11972_g1,Pli_16677_g1,Pli_10095_g1,Pli_1074_g1,Pli_14017_g1,Pli_17980_g1,Pli_21663_g1,Pli_15341_g1,Pli_10008_g1,Pli_21401_g1,Pli_11209_g1,Pli_3611_g1,Pli_12335_g1,Pli_14465_g1,Pli_14225_g1,Pli_18077_g1,Pli_3373_g1,Pli_9835_g1,Pli_4398_g1,Pli_687_g1,Pli_12311_g1,Pli_1…
Genetic Information Processing	Translation	Ribosome biogenesis in eukaryotes	ko03008	58	Pli_76_g1,Pli_15017_g1,Pli_9258_g1,Pli_7462_g1,Pli_20913_g1,Pli_3786_g1,Pli_21403_g1,Pli_17988_g1,Pli_20303_g1,Pli_18290_g1,Pli_4602_g1,Pli_10382_g1,Pli_13124_g1,Pli_33_g1,Pli_2030_g1,Pli_2797_g1,Pli_20257_g1,Pli_4835_g1,Pli_2060_g1,Pli_12785_g1,Pli_11130_g1,Pli_4294_g1,Pli_1267_g1,Pli_10363_g1,Pli_1219_g1,Pli_21941_g1,Pli_5087_g1,Pli_12112_g1,Pli_4560_g1,Pli_20346_g1,Pli_6728_g1,Pli_5543_g1,Pli_…
Genetic Information Processing	Translation	mRNA surveillance pathway	ko03015	57	Pli_3636_g1,Pli_3828_g1,Pli_7574_g1,Pli_22545_g1,Pli_2033_g1,Pli_3790_g1,Pli_4022_g1,Pli_18970_g1,Pli_3069_g1,Pli_8022_g1,Pli_17504_g1,Pli_2824_g1,Pli_13768_g1,Pli_14388_g1,Pli_2976_g1,Pli_7906_g1,Pli_2865_g1,Pli_3920_g1,Pli_12286_g1,Pli_4595_g1,Pli_8347_g1,Pli_6055_g2,Pli_8231_g1,Pli_5986_g2,Pli_12560_g1,Pli_22511_g1,Pli_20192_g1,Pli_12153_g1,Pli_6287_g2,Pli_8432_g1,Pli_17883_g1,Pli_17714_g1,Pli…
Metabolism	Amino acid metabolism	Alanine, aspartate and glutamate metabolism	ko00250	35	Pli_2851_g1,Pli_684_g1,Pli_6200_g3,Pli_9796_g1,Pli_12540_g1,Pli_8709_g1,Pli_7419_g1,Pli_7099_g1,Pli_5094_g1,Pli_12790_g1,Pli_1178_g1,Pli_7496_g1,Pli_1136_g1,Pli_5717_g2,Pli_15346_g1,Pli_6576_g1,Pli_17550_g1,Pli_15009_g1,Pli_7146_g1,Pli_17254_g1,Pli_9911_g1,Pli_18242_g1,Pli_11639_g1,Pli_14369_g1,Pli_9646_g1,Pli_2211_g1,Pli_11841_g1,Pli_7145_g1,Pli_7786_g1,Pli_4992_g1,Pli_18183_g1,Pli_12271_g1,Pli_…
Metabolism	Amino acid metabolism	Arginine and proline metabolism	ko00330	60	Pli_19990_g1,Pli_684_g1,Pli_20393_g1,Pli_18547_g1,Pli_6200_g3,Pli_2851_g1,Pli_1635_g1,Pli_3001_g1,Pli_6904_g1,Pli_9972_g1,Pli_22528_g1,Pli_12319_g1,Pli_9509_g1,Pli_6240_g2,Pli_14894_g1,Pli_2782_g1,Pli_7866_g1,Pli_11613_g1,Pli_15009_g1,Pli_17550_g1,Pli_20400_g1,Pli_13634_g1,Pli_6544_g1,Pli_15340_g1,Pli_17254_g1,Pli_7401_g1,Pli_5883_g1,Pli_7156_g1,Pli_9911_g1,Pli_8193_g1,Pli_7803_g1,Pli_8760_g1,Pli…
Metabolism	Amino acid metabolism	Cysteine and methionine metabolism	ko00270	55	Pli_260_g1,Pli_11311_g1,Pli_18995_g1,Pli_17950_g1,Pli_18833_g1,Pli_6204_g1,Pli_15071_g1,Pli_13115_g1,Pli_8953_g1,Pli_10725_g1,Pli_16395_g1,Pli_20755_g1,Pli_17563_g1,Pli_8964_g1,Pli_13191_g1,Pli_2735_g1,Pli_16398_g1,Pli_20986_g1,Pli_18874_g1,Pli_16582_g1,Pli_11396_g1,Pli_241_g1,Pli_10195_g1,Pli_15011_g1,Pli_9646_g1,Pli_22436_g1,Pli_778_g1,Pli_561_g1,Pli_17229_g1,Pli_8193_g1,Pli_4019_g1,Pli_11463_g…
Metabolism	Amino acid metabolism	Glycine, serine and threonine metabolism	ko00260	64	Pli_2182_g1,Pli_12749_g1,Pli_13101_g1,Pli_12332_g1,Pli_14849_g1,Pli_15355_g1,Pli_20041_g1,Pli_9893_g1,Pli_4597_g1,Pli_15011_g1,Pli_13229_g1,Pli_8159_g1,Pli_3188_g1,Pli_20188_g1,Pli_5063_g3,Pli_14898_g1,Pli_5063_g2,Pli_20386_g1,Pli_4019_g1,Pli_4891_g1,Pli_6719_g2,Pli_5862_g1,Pli_1712_g1,Pli_6034_g1,Pli_6034_g2,Pli_6821_g1,Pli_20210_g1,Pli_14865_g1,Pli_9869_g1,Pli_15045_g1,Pli_14239_g1,Pli_7287_g1,…
Metabolism	Amino acid metabolism	Histidine metabolism	ko00340	27	Pli_20988_g1,Pli_9509_g1,Pli_5134_g1,Pli_9972_g1,Pli_20759_g1,Pli_8760_g1,Pli_4985_g1,Pli_17641_g1,Pli_1635_g1,Pli_14152_g1,Pli_967_g1,Pli_15033_g1,Pli_4310_g1,Pli_18547_g1,Pli_19990_g1,Pli_20441_g1,Pli_5883_g1,Pli_15340_g1,Pli_15295_g1,Pli_1544_g2,Pli_15547_g1,Pli_20838_g1,Pli_11613_g1,Pli_15334_g1,Pli_4313_g1,Pli_1544_g1,Pli_14894_g1
Metabolism	Amino acid metabolism	Lysine biosynthesis	ko00300	9	Pli_14894_g1,Pli_5003_g2,Pli_4019_g1,Pli_4597_g1,Pli_20386_g1,Pli_15011_g1,Pli_17573_g1,Pli_15066_g1,Pli_10725_g1
Metabolism	Amino acid metabolism	Lysine degradation	ko00310	37	Pli_7496_g1,Pli_14894_g1,Pli_4130_g1,Pli_9184_g1,Pli_8390_g1,Pli_15147_g1,Pli_15340_g1,Pli_9953_g1,Pli_169_g1,Pli_5883_g1,Pli_19990_g1,Pli_4868_g1,Pli_18547_g1,Pli_1635_g1,Pli_9972_g1,Pli_18037_g1,Pli_6974_g1,Pli_12790_g1,Pli_5935_g1,Pli_9509_g1,Pli_4313_g1,Pli_3198_g1,Pli_5332_g1,Pli_4992_g1,Pli_4545_g1,Pli_5370_g1,Pli_16989_g1,Pli_12398_g1,Pli_3989_g1,Pli_2228_g1,Pli_11639_g1,Pli_641_g1,Pli_703…
Metabolism	Amino acid metabolism	Phenylalanine metabolism	ko00360	33	Pli_15297_g1,Pli_12878_g1,Pli_19665_g1,Pli_6560_g1,Pli_2462_g1,Pli_4143_g1,Pli_2714_g1,Pli_15770_g1,Pli_3483_g1,Pli_9646_g1,Pli_1622_g1,Pli_14152_g1,Pli_9659_g1,Pli_4991_g3,Pli_5507_g1,Pli_8159_g1,Pli_2518_g1,Pli_1544_g2,Pli_4991_g1,Pli_5825_g1,Pli_7695_g1,Pli_10708_g1,Pli_8416_g1,Pli_6508_g1,Pli_1544_g1,Pli_5515_g1,Pli_8772_g1,Pli_17687_g1,Pli_15747_g1,Pli_8726_g1,Pli_15071_g1,Pli_17664_g1,Pli_1…
Metabolism	Amino acid metabolism	Phenylalanine, tyrosine and tryptophan biosynthesis	ko00400	29	Pli_1544_g2,Pli_10562_g1,Pli_20201_g1,Pli_7313_g1,Pli_6560_g1,Pli_4991_g1,Pli_9720_g1,Pli_10080_g1,Pli_10615_g1,Pli_1848_g1,Pli_10763_g1,Pli_15297_g1,Pli_15042_g1,Pli_6508_g1,Pli_5538_g2,Pli_1544_g1,Pli_7695_g1,Pli_3571_g1,Pli_9646_g1,Pli_17687_g1,Pli_10153_g1,Pli_20285_g1,Pli_12772_g1,Pli_9869_g1,Pli_13659_g1,Pli_18256_g1,Pli_15071_g1,Pli_4991_g3,Pli_5507_g1
Metabolism	Amino acid metabolism	Tryptophan metabolism	ko00380	26	Pli_4313_g1,Pli_3396_g1,Pli_4130_g1,Pli_14894_g1,Pli_8390_g1,Pli_19995_g1,Pli_2462_g1,Pli_9953_g1,Pli_15340_g1,Pli_169_g1,Pli_7745_g1,Pli_7297_g1,Pli_12398_g1,Pli_5883_g1,Pli_18547_g1,Pli_11999_g1,Pli_19990_g1,Pli_3717_g1,Pli_1635_g1,Pli_8726_g1,Pli_9972_g1,Pli_3483_g1,Pli_20759_g1,Pli_8760_g1,Pli_3846_g1,Pli_9509_g1
Metabolism	Amino acid metabolism	Tyrosine metabolism	ko00350	38	Pli_20988_g1,Pli_12790_g1,Pli_3563_g1,Pli_17687_g1,Pli_18746_g1,Pli_17737_g1,Pli_15071_g1,Pli_4310_g1,Pli_4991_g1,Pli_1544_g2,Pli_18175_g1,Pli_20838_g1,Pli_16293_g1,Pli_1544_g1,Pli_7496_g1,Pli_6508_g1,Pli_8416_g1,Pli_3321_g1,Pli_10867_g1,Pli_9646_g1,Pli_7045_g3,Pli_10300_g1,Pli_11639_g1,Pli_4991_g3,Pli_5507_g1,Pli_1622_g1,Pli_14152_g1,Pli_8159_g1,Pli_18898_g1,Pli_15297_g1,Pli_17939_g1,Pli_6560_g1…
Metabolism	Amino acid metabolism	Valine, leucine and isoleucine biosynthesis	ko00290	12	Pli_10258_g1,Pli_15064_g1,Pli_20372_g1,Pli_5317_g1,Pli_15551_g1,Pli_17042_g1,Pli_15771_g1,Pli_3634_g1,Pli_15644_g1,Pli_7741_g1,Pli_13812_g1,Pli_12805_g1
Metabolism	Amino acid metabolism	Valine, leucine and isoleucine degradation	ko00280	47	Pli_15685_g1,Pli_5381_g1,Pli_20759_g1,Pli_17846_g1,Pli_8760_g1,Pli_20247_g1,Pli_18171_g1,Pli_7598_g1,Pli_3846_g1,Pli_5864_g1,Pli_15644_g1,Pli_8643_g1,Pli_4313_g1,Pli_637_g1,Pli_10668_g1,Pli_12398_g1,Pli_15906_g1,Pli_12376_g1,Pli_10902_g1,Pli_18547_g1,Pli_7128_g1,Pli_19990_g1,Pli_21992_g1,Pli_14862_g1,Pli_1635_g1,Pli_9972_g1,Pli_18164_g1,Pli_9509_g1,Pli_1178_g1,Pli_7482_g1,Pli_14894_g1,Pli_15909_g…
Metabolism	Biosynthesis of other secondary metabolites	Aflatoxin biosynthesis	ko00254	1	Pli_5348_g1
Metabolism	Biosynthesis of other secondary metabolites	Betalain biosynthesis	ko00965	5	Pli_17939_g1,Pli_4871_g1,Pli_21302_g1,Pli_15176_g1,Pli_3321_g1
Metabolism	Biosynthesis of other secondary metabolites	Butirosin and neomycin biosynthesis	ko00524	3	Pli_6066_g2,Pli_6066_g1,Pli_5486_g1
Metabolism	Biosynthesis of other secondary metabolites	Caffeine metabolism	ko00232	2	Pli_7234_g1,Pli_15115_g1
Metabolism	Biosynthesis of other secondary metabolites	Flavone and flavonol biosynthesis	ko00944	1	Pli_15187_g1
Metabolism	Biosynthesis of other secondary metabolites	Flavonoid biosynthesis	ko00941	9	Pli_15187_g1,Pli_14217_g1,Pli_14786_g1,Pli_16995_g1,Pli_22329_g1,Pli_9659_g1,Pli_19665_g1,Pli_14399_g1,Pli_2714_g1
Metabolism	Biosynthesis of other secondary metabolites	Isoquinoline alkaloid biosynthesis	ko00950	13	Pli_15297_g1,Pli_17687_g1,Pli_9646_g1,Pli_7045_g3,Pli_4991_g1,Pli_6560_g1,Pli_5507_g1,Pli_4991_g3,Pli_1622_g1,Pli_15071_g1,Pli_8159_g1,Pli_8416_g1,Pli_6508_g1
Metabolism	Biosynthesis of other secondary metabolites	Novobiocin biosynthesis	ko00401	4	Pli_15071_g1,Pli_6560_g1,Pli_1544_g1,Pli_1544_g2
Metabolism	Biosynthesis of other secondary metabolites	Penicillin and cephalosporin biosynthesis	ko00311	1	Pli_3001_g1
Metabolism	Biosynthesis of other secondary metabolites	Phenylpropanoid biosynthesis	ko00940	42	Pli_5515_g1,Pli_10708_g1,Pli_5334_g2,Pli_6685_g1,Pli_3903_g1,Pli_5825_g1,Pli_17345_g1,Pli_3849_g1,Pli_10177_g1,Pli_1284_g1,Pli_3835_g1,Pli_16737_g1,Pli_14217_g1,Pli_11107_g1,Pli_17664_g1,Pli_8726_g1,Pli_616_g1,Pli_2944_g1,Pli_10286_g1,Pli_4334_g1,Pli_15747_g1,Pli_8772_g1,Pli_15854_g1,Pli_13974_g1,Pli_11470_g1,Pli_4143_g1,Pli_5334_g1,Pli_2462_g1,Pli_12080_g1,Pli_12328_g1,Pli_12878_g1,Pli_7226_g1,P…
Metabolism	Biosynthesis of other secondary metabolites	Stilbenoid, diarylheptanoid and gingerol biosynthesis	ko00945	6	Pli_19665_g1,Pli_16154_g1,Pli_14217_g1,Pli_18905_g1,Pli_9659_g1,Pli_2714_g1
Metabolism	Biosynthesis of other secondary metabolites	Streptomycin biosynthesis	ko00521	10	Pli_6066_g1,Pli_17011_g1,Pli_20243_g1,Pli_6066_g2,Pli_6748_g1,Pli_19035_g1,Pli_5486_g1,Pli_14814_g1,Pli_11757_g1,Pli_15254_g1
Metabolism	Biosynthesis of other secondary metabolites	Tropane, piperidine and pyridine alkaloid biosynthesis	ko00960	14	Pli_6508_g1,Pli_8416_g1,Pli_1544_g1,Pli_8159_g1,Pli_15071_g1,Pli_1622_g1,Pli_5507_g1,Pli_4991_g3,Pli_1544_g2,Pli_4991_g1,Pli_6560_g1,Pli_9646_g1,Pli_17687_g1,Pli_15297_g1
Metabolism	Carbohydrate metabolism	Amino sugar and nucleotide sugar metabolism	ko00520	35	Pli_4476_g1,Pli_17011_g1,Pli_15666_g1,Pli_15171_g1,Pli_10434_g1,Pli_2616_g1,Pli_17689_g1,Pli_1282_g2,Pli_505_g1,Pli_12555_g1,Pli_7145_g1,Pli_4822_g1,Pli_14814_g1,Pli_15208_g1,Pli_6066_g2,Pli_12731_g1,Pli_17764_g1,Pli_2157_g1,Pli_6066_g1,Pli_7194_g1,Pli_1282_g1,Pli_2967_g1,Pli_20225_g1,Pli_5486_g1,Pli_6060_g1,Pli_4484_g1,Pli_20981_g1,Pli_15089_g1,Pli_15798_g1,Pli_20611_g1,Pli_20260_g1,Pli_20734_g1…
Metabolism	Carbohydrate metabolism	Ascorbate and aldarate metabolism	ko00053	23	Pli_14894_g1,Pli_4018_g1,Pli_4313_g1,Pli_18381_g1,Pli_1282_g2,Pli_16490_g1,Pli_22245_g1,Pli_15340_g1,Pli_9769_g1,Pli_5883_g1,Pli_15089_g1,Pli_21418_g1,Pli_18547_g1,Pli_11668_g1,Pli_19990_g1,Pli_1282_g1,Pli_19923_g1,Pli_1635_g1,Pli_12198_g1,Pli_20759_g1,Pli_8760_g1,Pli_9972_g1,Pli_9509_g1
Metabolism	Carbohydrate metabolism	Butanoate metabolism	ko00650	23	Pli_4992_g1,Pli_8390_g1,Pli_8975_g1,Pli_7255_g1,Pli_7496_g1,Pli_12376_g1,Pli_12398_g1,Pli_1173_g1,Pli_16989_g1,Pli_14862_g1,Pli_12540_g1,Pli_6439_g1,Pli_11639_g1,Pli_13812_g1,Pli_12790_g1,Pli_1178_g1,Pli_7482_g1,Pli_10258_g1,Pli_11841_g1,Pli_5470_g1,Pli_13836_g1,Pli_3846_g1,Pli_8709_g1
Metabolism	Carbohydrate metabolism	C5-Branched dibasic acid metabolism	ko00660	3	Pli_13812_g1,Pli_15064_g1,Pli_10258_g1
Metabolism	Carbohydrate metabolism	Citrate cycle (TCA cycle)	ko00020	35	Pli_4130_g1,Pli_17563_g1,Pli_13191_g1,Pli_4086_g2,Pli_20370_g1,Pli_4086_g1,Pli_9781_g1,Pli_169_g1,Pli_18797_g1,Pli_9953_g1,Pli_9664_g1,Pli_15147_g1,Pli_1560_g1,Pli_9820_g1,Pli_17432_g1,Pli_7413_g1,Pli_12601_g1,Pli_5935_g1,Pli_12652_g1,Pli_22181_g1,Pli_18523_g1,Pli_1022_g1,Pli_7248_g1,Pli_4545_g1,Pli_3703_g1,Pli_20299_g1,Pli_3703_g2,Pli_20096_g1,Pli_7629_g1,Pli_15156_g1,Pli_12528_g1,Pli_10195_g1,P…
Metabolism	Carbohydrate metabolism	Fructose and mannose metabolism	ko00051	30	Pli_1828_g2,Pli_14996_g1,Pli_17830_g1,Pli_15214_g1,Pli_3177_g1,Pli_8612_g1,Pli_14912_g1,Pli_20037_g1,Pli_10434_g1,Pli_20107_g1,Pli_13836_g1,Pli_4476_g1,Pli_903_g1,Pli_284_g1,Pli_16060_g1,Pli_5411_g1,Pli_20712_g1,Pli_19504_g1,Pli_1869_g1,Pli_12505_g1,Pli_6828_g1,Pli_12555_g1,Pli_15798_g1,Pli_17740_g1,Pli_20981_g1,Pli_18050_g1,Pli_15245_g1,Pli_1641_g1,Pli_3826_g1,Pli_11589_g1
Metabolism	Carbohydrate metabolism	Galactose metabolism	ko00052	20	Pli_2967_g1,Pli_17579_g1,Pli_22004_g1,Pli_5486_g1,Pli_20225_g1,Pli_6066_g1,Pli_2157_g1,Pli_4917_g1,Pli_17011_g1,Pli_12731_g1,Pli_6066_g2,Pli_3334_g1,Pli_6250_g1,Pli_9704_g1,Pli_14814_g1,Pli_4933_g1,Pli_16443_g1,Pli_15245_g1,Pli_11589_g1,Pli_4484_g1
Metabolism	Carbohydrate metabolism	Glycolysis / Gluconeogenesis	ko00010	92	Pli_17737_g1,Pli_17830_g1,Pli_14996_g1,Pli_7733_g1,Pli_19990_g1,Pli_18547_g1,Pli_9509_g1,Pli_13007_g1,Pli_9173_g1,Pli_9972_g1,Pli_12601_g1,Pli_7321_g1,Pli_1649_g1,Pli_4086_g1,Pli_16293_g1,Pli_7036_g1,Pli_4086_g2,Pli_14894_g1,Pli_11451_g1,Pli_5883_g1,Pli_1560_g1,Pli_4336_g1,Pli_18175_g1,Pli_9781_g1,Pli_987_g2,Pli_14221_g1,Pli_284_g1,Pli_20759_g1,Pli_9071_g1,Pli_12505_g1,Pli_21689_g1,Pli_1750_g1,Pl…
Metabolism	Carbohydrate metabolism	Glyoxylate and dicarboxylate metabolism	ko00630	40	Pli_3188_g2,Pli_11999_g1,Pli_684_g1,Pli_4710_g1,Pli_19580_g1,Pli_6034_g1,Pli_18164_g1,Pli_16100_g1,Pli_12652_g1,Pli_6034_g2,Pli_3396_g1,Pli_4099_g1,Pli_18172_g1,Pli_17563_g1,Pli_13191_g1,Pli_1136_g1,Pli_9664_g1,Pli_14942_g1,Pli_17254_g1,Pli_3482_g1,Pli_3188_g1,Pli_14518_g1,Pli_12528_g1,Pli_3717_g1,Pli_13960_g1,Pli_10195_g1,Pli_17846_g1,Pli_20145_g1,Pli_14369_g1,Pli_7502_g1,Pli_17301_g1,Pli_9893_g…
Metabolism	Carbohydrate metabolism	Inositol phosphate metabolism	ko00562	51	Pli_6748_g1,Pli_14866_g1,Pli_14996_g1,Pli_17830_g1,Pli_15254_g1,Pli_7014_g1,Pli_146_g1,Pli_5748_g1,Pli_4611_g1,Pli_12346_g1,Pli_5225_g1,Pli_9570_g1,Pli_4630_g1,Pli_2528_g1,Pli_5036_g1,Pli_5286_g2,Pli_4536_g1,Pli_17250_g1,Pli_20163_g1,Pli_18159_g1,Pli_9891_g1,Pli_10129_g1,Pli_6241_g1,Pli_20169_g1,Pli_20243_g1,Pli_19035_g1,Pli_6124_g1,Pli_15234_g1,Pli_10259_g1,Pli_7865_g1,Pli_4530_g1,Pli_11757_g1,P…
Metabolism	Carbohydrate metabolism	Pentose and glucuronate interconversions	ko00040	29	Pli_2251_g1,Pli_19990_g1,Pli_18547_g1,Pli_17616_g1,Pli_1635_g1,Pli_2967_g1,Pli_1282_g1,Pli_13241_g1,Pli_9972_g1,Pli_8760_g1,Pli_12198_g1,Pli_20605_g1,Pli_9509_g1,Pli_5868_g1,Pli_2738_g1,Pli_3689_g1,Pli_4313_g1,Pli_21811_g1,Pli_15262_g1,Pli_15340_g1,Pli_11589_g1,Pli_13985_g1,Pli_11380_g1,Pli_1282_g2,Pli_3826_g1,Pli_15089_g1,Pli_5883_g1,Pli_8184_g1,Pli_3075_g1
Metabolism	Carbohydrate metabolism	Pentose phosphate pathway	ko00030	29	Pli_903_g1,Pli_20605_g1,Pli_17943_g1,Pli_17011_g1,Pli_7194_g1,Pli_4990_g1,Pli_17609_g1,Pli_4344_g1,Pli_284_g1,Pli_2863_g1,Pli_16060_g1,Pli_748_g1,Pli_3177_g1,Pli_8612_g1,Pli_9855_g1,Pli_20245_g1,Pli_18783_g1,Pli_2616_g1,Pli_14900_g1,Pli_20037_g1,Pli_15245_g1,Pli_18050_g1,Pli_17740_g1,Pli_21539_g1,Pli_1969_g1,Pli_12505_g1,Pli_9866_g1,Pli_1869_g1,Pli_14814_g1
Metabolism	Carbohydrate metabolism	Propanoate metabolism	ko00640	41	Pli_14928_g1,Pli_1635_g1,Pli_12540_g1,Pli_6145_g1,Pli_19990_g1,Pli_17432_g1,Pli_18547_g1,Pli_1178_g1,Pli_21026_g1,Pli_469_g1,Pli_9509_g1,Pli_18164_g1,Pli_9972_g1,Pli_987_g1,Pli_1649_g1,Pli_8390_g1,Pli_14894_g1,Pli_9891_g1,Pli_5883_g1,Pli_10129_g1,Pli_8953_g1,Pli_15340_g1,Pli_14942_g1,Pli_987_g2,Pli_5348_g1,Pli_15685_g1,Pli_11396_g1,Pli_3846_g1,Pli_18171_g1,Pli_20247_g1,Pli_8760_g1,Pli_17846_g1,Pl…
Metabolism	Carbohydrate metabolism	Pyruvate metabolism	ko00620	63	Pli_4760_g1,Pli_6488_g1,Pli_14894_g1,Pli_6183_g1,Pli_13191_g1,Pli_4086_g2,Pli_17563_g1,Pli_4086_g1,Pli_6428_g1,Pli_7036_g1,Pli_1796_g1,Pli_987_g2,Pli_9781_g1,Pli_15340_g1,Pli_1560_g1,Pli_4336_g1,Pli_8953_g1,Pli_7036_g2,Pli_20372_g1,Pli_5883_g1,Pli_19990_g1,Pli_7733_g1,Pli_18547_g1,Pli_4710_g1,Pli_1635_g1,Pli_14928_g1,Pli_1649_g1,Pli_17617_g1,Pli_9972_g1,Pli_6034_g1,Pli_12601_g1,Pli_6183_g2,Pli_98…
Metabolism	Carbohydrate metabolism	Starch and sucrose metabolism	ko00500	59	Pli_10177_g1,Pli_12216_g1,Pli_8184_g1,Pli_3849_g1,Pli_15089_g1,Pli_16443_g1,Pli_11380_g1,Pli_3903_g1,Pli_6250_g1,Pli_3765_g1,Pli_4282_g1,Pli_9704_g1,Pli_15262_g1,Pli_21811_g1,Pli_4933_g1,Pli_7194_g1,Pli_15854_g1,Pli_6066_g1,Pli_279_g1,Pli_10286_g1,Pli_7050_g1,Pli_847_g1,Pli_4334_g1,Pli_15991_g1,Pli_6066_g2,Pli_616_g1,Pli_5486_g1,Pli_2967_g1,Pli_13241_g1,Pli_16737_g1,Pli_11107_g1,Pli_1284_g1,Pli_3…
Metabolism	Energy metabolism	Carbon fixation in photosynthetic organisms	ko00710	40	Pli_19641_g1,Pli_6488_g1,Pli_4086_g1,Pli_17563_g1,Pli_10182_g1,Pli_13191_g1,Pli_4086_g2,Pli_21539_g1,Pli_6576_g1,Pli_5396_g1,Pli_18017_g1,Pli_14996_g1,Pli_17830_g1,Pli_9855_g1,Pli_9173_g1,Pli_17617_g1,Pli_7321_g1,Pli_903_g1,Pli_5880_g1,Pli_1272_g1,Pli_1750_g1,Pli_12505_g1,Pli_1869_g1,Pli_4916_g1,Pli_19698_g1,Pli_1641_g1,Pli_18050_g1,Pli_17740_g1,Pli_15297_g1,Pli_14518_g1,Pli_20037_g1,Pli_3177_g1,…
Metabolism	Energy metabolism	Carbon fixation pathways in prokaryotes	ko00720	31	Pli_9820_g1,Pli_987_g2,Pli_21333_g1,Pli_18797_g1,Pli_9664_g1,Pli_14942_g1,Pli_6320_g1,Pli_20299_g1,Pli_1022_g1,Pli_1649_g2,Pli_7255_g1,Pli_6995_g1,Pli_637_g1,Pli_5880_g1,Pli_469_g1,Pli_16424_g1,Pli_18164_g1,Pli_5470_g1,Pli_14623_g1,Pli_22181_g1,Pli_1649_g1,Pli_7413_g1,Pli_17846_g1,Pli_987_g1,Pli_2036_g1,Pli_12528_g1,Pli_6439_g1,Pli_14928_g1,Pli_15156_g1,Pli_13057_g1,Pli_9771_g1
Metabolism	Energy metabolism	Methane metabolism	ko00680	47	Pli_3188_g1,Pli_14221_g1,Pli_20037_g1,Pli_20188_g1,Pli_3177_g1,Pli_8612_g1,Pli_284_g1,Pli_16060_g1,Pli_13960_g1,Pli_17301_g1,Pli_7804_g1,Pli_13229_g1,Pli_11147_g1,Pli_15355_g1,Pli_6995_g1,Pli_20041_g1,Pli_1649_g2,Pli_7266_g1,Pli_12505_g1,Pli_21689_g1,Pli_1869_g1,Pli_6320_g1,Pli_21333_g1,Pli_17740_g1,Pli_18050_g1,Pli_14865_g1,Pli_3188_g2,Pli_14928_g1,Pli_987_g1,Pli_4221_g1,Pli_19580_g1,Pli_1649_g1…
Metabolism	Energy metabolism	Nitrogen metabolism	ko00910	21	Pli_16418_g1,Pli_15888_g1,Pli_7419_g1,Pli_14369_g1,Pli_18417_g1,Pli_6200_g3,Pli_684_g1,Pli_19435_g1,Pli_2851_g1,Pli_6097_g1,Pli_8899_g1,Pli_17254_g1,Pli_8642_g1,Pli_18149_g1,Pli_17550_g1,Pli_15346_g1,Pli_20667_g1,Pli_1333_g1,Pli_7618_g1,Pli_7786_g1,Pli_2514_g2
Metabolism	Energy metabolism	Oxidative phosphorylation	ko00190	85	Pli_9023_g1,Pli_7256_g1,Pli_1247_g1,Pli_9399_g1,Pli_10147_g1,Pli_20558_g1,Pli_21726_g1,Pli_16152_g1,Pli_3547_g1,Pli_12501_g1,Pli_17294_g1,Pli_7388_g1,Pli_12407_g1,Pli_9856_g1,Pli_17526_g1,Pli_3703_g1,Pli_15772_g1,Pli_3703_g2,Pli_1410_g1,Pli_2279_g1,Pli_22423_g1,Pli_7629_g1,Pli_20704_g1,Pli_11499_g1,Pli_16749_g1,Pli_4724_g1,Pli_12435_g1,Pli_10046_g1,Pli_17572_g1,Pli_1251_g1,Pli_19523_g1,Pli_18494_…
Metabolism	Energy metabolism	Photosynthesis - antenna proteins	ko00196	4	Pli_11154_g1,Pli_552_g1,Pli_13844_g1,Pli_17259_g1
Metabolism	Energy metabolism	Sulfur metabolism	ko00920	15	Pli_6566_g1,Pli_3886_g1,Pli_18431_g1,Pli_1364_g1,Pli_6204_g1,Pli_260_g1,Pli_6205_g1,Pli_11311_g1,Pli_20589_g1,Pli_13115_g1,Pli_3990_g1,Pli_12455_g1,Pli_3906_g1,Pli_11463_g1,Pli_2735_g1
Metabolism	Glycan biosynthesis and metabolism	Glycosaminoglycan biosynthesis - keratan sulfate	ko00533	1	Pli_1240_g1
Metabolism	Glycan biosynthesis and metabolism	Glycosaminoglycan degradation	ko00531	3	Pli_4590_g1,Pli_14364_g1,Pli_176_g1
Metabolism	Glycan biosynthesis and metabolism	Glycosphingolipid biosynthesis - ganglio series	ko00604	2	Pli_10556_g1,Pli_2811_g1
Metabolism	Glycan biosynthesis and metabolism	Glycosphingolipid biosynthesis - lacto and neolacto series	ko00601	1	Pli_1240_g1
Metabolism	Glycan biosynthesis and metabolism	Glycosylphosphatidylinositol(GPI)-anchor biosynthesis	ko00563	22	Pli_7059_g5,Pli_60_g2,Pli_6440_g1,Pli_7535_g1,Pli_430_g2,Pli_15287_g1,Pli_1280_g1,Pli_16018_g1,Pli_6296_g2,Pli_5749_g1,Pli_10534_g1,Pli_20660_g1,Pli_6296_g3,Pli_6455_g1,Pli_60_g1,Pli_2696_g2,Pli_15333_g1,Pli_348_g1,Pli_1342_g1,Pli_15497_g1,Pli_6801_g1,Pli_15737_g1
Metabolism	Glycan biosynthesis and metabolism	Lipopolysaccharide biosynthesis	ko00540	5	Pli_15303_g1,Pli_1427_g1,Pli_2748_g1,Pli_3363_g1,Pli_13608_g1
Metabolism	Glycan biosynthesis and metabolism	Mucin type O-glycan biosynthesis	ko00512	1	Pli_3939_g1
Metabolism	Glycan biosynthesis and metabolism	N-Glycan biosynthesis	ko00510	26	Pli_18068_g1,Pli_1240_g1,Pli_6388_g1,Pli_1417_g1,Pli_5890_g1,Pli_3276_g1,Pli_19805_g1,Pli_4208_g1,Pli_20732_g1,Pli_8260_g1,Pli_9153_g1,Pli_20463_g1,Pli_12997_g1,Pli_1044_g1,Pli_20693_g1,Pli_14641_g1,Pli_6649_g1,Pli_20771_g1,Pli_12715_g1,Pli_18543_g1,Pli_15267_g1,Pli_2093_g1,Pli_3557_g1,Pli_17680_g1,Pli_16059_g1,Pli_15038_g1
Metabolism	Glycan biosynthesis and metabolism	Other glycan degradation	ko00511	16	Pli_18174_g1,Pli_3960_g1,Pli_3960_g2,Pli_13020_g1,Pli_12866_g1,Pli_12648_g1,Pli_6146_g2,Pli_20320_g1,Pli_22472_g1,Pli_15348_g1,Pli_6155_g1,Pli_11421_g1,Pli_1610_g1,Pli_285_g1,Pli_9190_g1,Pli_20258_g1
Metabolism	Glycan biosynthesis and metabolism	Other types of O-glycan biosynthesis	ko00514	8	Pli_19224_g1,Pli_10108_g1,Pli_13123_g1,Pli_22071_g1,Pli_8550_g1,Pli_6972_g2,Pli_1240_g1,Pli_6972_g1
Metabolism	Glycan biosynthesis and metabolism	Peptidoglycan biosynthesis	ko00550	1	Pli_21135_g1
Metabolism	Glycan biosynthesis and metabolism	Various types of N-glycan biosynthesis	ko00513	19	Pli_18068_g1,Pli_1240_g1,Pli_6388_g1,Pli_5890_g1,Pli_20732_g1,Pli_4208_g1,Pli_20463_g1,Pli_12997_g1,Pli_1044_g1,Pli_8260_g1,Pli_9153_g1,Pli_20771_g1,Pli_18543_g1,Pli_12715_g1,Pli_13171_g1,Pli_15267_g1,Pli_15038_g1,Pli_2093_g1,Pli_3557_g1
Metabolism	Lipid metabolism	Arachidonic acid metabolism	ko00590	16	Pli_20194_g1,Pli_18252_g1,Pli_20051_g1,Pli_8460_g1,Pli_11008_g1,Pli_691_g1,Pli_2077_g1,Pli_18177_g1,Pli_19095_g1,Pli_20147_g1,Pli_18577_g1,Pli_15718_g1,Pli_2162_g1,Pli_6100_g2,Pli_19056_g1,Pli_38_g1
Metabolism	Lipid metabolism	Biosynthesis of unsaturated fatty acids	ko01040	23	Pli_19960_g1,Pli_3846_g1,Pli_7598_g1,Pli_19563_g1,Pli_1860_g1,Pli_8890_g1,Pli_3785_g1,Pli_17829_g1,Pli_7015_g1,Pli_13947_g1,Pli_58_g1,Pli_20742_g1,Pli_18643_g1,Pli_2064_g1,Pli_6505_g1,Pli_7015_g2,Pli_13680_g1,Pli_7015_g3,Pli_8390_g1,Pli_10306_g1,Pli_13079_g1,Pli_15294_g1,Pli_15002_g1
Metabolism	Lipid metabolism	Cutin, suberine and wax biosynthesis	ko00073	8	Pli_18429_g1,Pli_5888_g1,Pli_8400_g1,Pli_20895_g1,Pli_11263_g1,Pli_16718_g1,Pli_15810_g1,Pli_11558_g1
Metabolism	Lipid metabolism	Ether lipid metabolism	ko00565	10	Pli_17443_g1,Pli_19637_g1,Pli_21111_g1,Pli_20194_g1,Pli_10087_g1,Pli_21304_g1,Pli_20109_g1,Pli_18366_g1,Pli_10198_g1,Pli_6270_g1
Metabolism	Lipid metabolism	Fatty acid biosynthesis	ko00061	7	Pli_1300_g1,Pli_3785_g1,Pli_13680_g1,Pli_2227_g1,Pli_7067_g1,Pli_2359_g1,Pli_5348_g1
Metabolism	Lipid metabolism	Fatty acid degradation	ko00071	54	Pli_7015_g2,Pli_15340_g1,Pli_7015_g3,Pli_18175_g1,Pli_5883_g1,Pli_14894_g1,Pli_12756_g1,Pli_8390_g1,Pli_6216_g1,Pli_16293_g1,Pli_17456_g1,Pli_20177_g1,Pli_9972_g1,Pli_144_g1,Pli_18746_g1,Pli_7482_g1,Pli_3563_g1,Pli_9509_g1,Pli_1341_g1,Pli_13947_g1,Pli_18547_g1,Pli_7128_g1,Pli_19990_g1,Pli_17737_g1,Pli_17868_g1,Pli_1635_g1,Pli_7015_g1,Pli_12445_g1,Pli_10668_g1,Pli_2116_g2,Pli_10291_g1,Pli_18898_g1…
Metabolism	Lipid metabolism	Fatty acid elongation	ko00062	15	Pli_15008_g1,Pli_1499_g1,Pli_7128_g1,Pli_8643_g1,Pli_17829_g1,Pli_8390_g1,Pli_21358_g1,Pli_11716_g1,Pli_10306_g1,Pli_20177_g1,Pli_1860_g1,Pli_21023_g1,Pli_4059_g1,Pli_12398_g1,Pli_3846_g1
Metabolism	Lipid metabolism	Glycerolipid metabolism	ko00561	28	Pli_15299_g1,Pli_8760_g1,Pli_20759_g1,Pli_9972_g1,Pli_9509_g1,Pli_19831_g1,Pli_19990_g1,Pli_18547_g1,Pli_2489_g1,Pli_3102_g1,Pli_1635_g1,Pli_21996_g1,Pli_15340_g1,Pli_11589_g1,Pli_14864_g1,Pli_8316_g1,Pli_4687_g1,Pli_13044_g1,Pli_19601_g1,Pli_5883_g1,Pli_11451_g1,Pli_3268_g1,Pli_20194_g1,Pli_4099_g1,Pli_14894_g1,Pli_4313_g1,Pli_19948_g1,Pli_1698_g1
Metabolism	Lipid metabolism	Glycerophospholipid metabolism	ko00564	41	Pli_4508_g1,Pli_4796_g1,Pli_20109_g1,Pli_21996_g1,Pli_3817_g1,Pli_13044_g1,Pli_6270_g1,Pli_5064_g1,Pli_4687_g1,Pli_20758_g1,Pli_20194_g1,Pli_2437_g1,Pli_1698_g1,Pli_5454_g1,Pli_15511_g1,Pli_19831_g1,Pli_17503_g1,Pli_20499_g1,Pli_2489_g1,Pli_3738_g1,Pli_17644_g1,Pli_21160_g1,Pli_14864_g1,Pli_14855_g1,Pli_3596_g1,Pli_19601_g1,Pli_14287_g1,Pli_14844_g1,Pli_8316_g1,Pli_18216_g1,Pli_15137_g1,Pli_19948…
Metabolism	Lipid metabolism	Linoleic acid metabolism	ko00591	11	Pli_20194_g1,Pli_2162_g1,Pli_7728_g1,Pli_3795_g1,Pli_13731_g1,Pli_2254_g1,Pli_8473_g1,Pli_17407_g1,Pli_16332_g1,Pli_13836_g1,Pli_17396_g1
Metabolism	Lipid metabolism	Primary bile acid biosynthesis	ko00120	7	Pli_12792_g1,Pli_12636_g1,Pli_10490_g1,Pli_7386_g1,Pli_20120_g1,Pli_5563_g1,Pli_3573_g1
Metabolism	Lipid metabolism	Sphingolipid metabolism	ko00600	25	Pli_12648_g1,Pli_7702_g1,Pli_6146_g2,Pli_14624_g1,Pli_20151_g1,Pli_3960_g2,Pli_3683_g1,Pli_7410_g1,Pli_13020_g1,Pli_18174_g1,Pli_3960_g1,Pli_54_g1,Pli_9190_g1,Pli_1610_g1,Pli_18155_g1,Pli_3512_g1,Pli_285_g1,Pli_18046_g1,Pli_3066_g1,Pli_7339_g1,Pli_15348_g1,Pli_4071_g1,Pli_6155_g1,Pli_18392_g1,Pli_11421_g1
Metabolism	Lipid metabolism	Steroid biosynthesis	ko00100	13	Pli_20194_g1,Pli_9937_g1,Pli_20786_g1,Pli_4511_g1,Pli_18654_g1,Pli_16099_g1,Pli_2019_g1,Pli_723_g1,Pli_13654_g1,Pli_8332_g1,Pli_1777_g1,Pli_9293_g1,Pli_10840_g1
Metabolism	Lipid metabolism	Steroid hormone biosynthesis	ko00140	9	Pli_1860_g1,Pli_12198_g1,Pli_10439_g1,Pli_7728_g1,Pli_17939_g1,Pli_17407_g1,Pli_3321_g1,Pli_21302_g1,Pli_2162_g1
Metabolism	Lipid metabolism	Synthesis and degradation of ketone bodies	ko00072	4	Pli_1173_g1,Pli_8975_g1,Pli_12376_g1,Pli_14862_g1
Metabolism	Lipid metabolism	alpha-Linolenic acid metabolism	ko00592	38	Pli_19243_g1,Pli_1751_g1,Pli_7796_g1,Pli_20323_g1,Pli_20194_g1,Pli_9822_g1,Pli_18555_g1,Pli_898_g1,Pli_6505_g1,Pli_10668_g1,Pli_13869_g1,Pli_16725_g1,Pli_368_g1,Pli_58_g1,Pli_2469_g1,Pli_19515_g1,Pli_7025_g1,Pli_6604_g2,Pli_17396_g1,Pli_16332_g1,Pli_19960_g1,Pli_7598_g1,Pli_19563_g1,Pli_4192_g1,Pli_3891_g1,Pli_1751_g2,Pli_7015_g2,Pli_4862_g1,Pli_7015_g3,Pli_14161_g1,Pli_7015_g1,Pli_1362_g1,Pli_21…
Metabolism	Metabolism of cofactors and vitamins	Biotin metabolism	ko00780	7	Pli_20839_g1,Pli_10167_g1,Pli_3785_g1,Pli_1300_g1,Pli_13680_g1,Pli_10436_g1,Pli_2359_g1
Metabolism	Metabolism of cofactors and vitamins	Folate biosynthesis	ko00790	13	Pli_1385_g1,Pli_3968_g1,Pli_1558_g1,Pli_9_g1,Pli_10442_g1,Pli_10048_g1,Pli_20721_g1,Pli_14012_g1,Pli_5089_g1,Pli_19892_g1,Pli_7169_g1,Pli_7898_g1,Pli_8230_g1
Metabolism	Metabolism of cofactors and vitamins	Lipoic acid metabolism	ko00785	1	Pli_10096_g1
Metabolism	Metabolism of cofactors and vitamins	Nicotinate and nicotinamide metabolism	ko00760	15	Pli_2416_g1,Pli_10066_g1,Pli_9999_g1,Pli_5160_g1,Pli_4775_g2,Pli_17483_g1,Pli_5319_g1,Pli_2349_g1,Pli_17941_g1,Pli_10148_g1,Pli_22261_g1,Pli_17762_g1,Pli_9904_g1,Pli_7215_g1,Pli_2160_g1
Metabolism	Metabolism of cofactors and vitamins	One carbon pool by folate	ko00670	17	Pli_10442_g1,Pli_7266_g1,Pli_15189_g1,Pli_20041_g1,Pli_4981_g1,Pli_4464_g1,Pli_15229_g1,Pli_16100_g1,Pli_17301_g1,Pli_16424_g1,Pli_19580_g1,Pli_2036_g1,Pli_13057_g1,Pli_9771_g1,Pli_3188_g1,Pli_3188_g2,Pli_14898_g1
Metabolism	Metabolism of cofactors and vitamins	Pantothenate and CoA biosynthesis	ko00770	15	Pli_12911_g1,Pli_1592_g1,Pli_8465_g1,Pli_17042_g1,Pli_4198_g1,Pli_15644_g1,Pli_7741_g1,Pli_13812_g1,Pli_4579_g1,Pli_10141_g1,Pli_10258_g1,Pli_9955_g1,Pli_3861_g1,Pli_3498_g1,Pli_15551_g1
Metabolism	Metabolism of cofactors and vitamins	Porphyrin and chlorophyll metabolism	ko00860	23	Pli_18116_g1,Pli_12198_g1,Pli_17364_g1,Pli_17718_g1,Pli_5006_g1,Pli_16544_g1,Pli_15109_g1,Pli_20113_g1,Pli_20390_g1,Pli_4984_g1,Pli_20878_g1,Pli_19985_g1,Pli_7539_g1,Pli_12332_g1,Pli_14931_g1,Pli_4057_g1,Pli_2595_g1,Pli_20345_g1,Pli_7256_g1,Pli_2595_g2,Pli_12090_g1,Pli_17551_g1,Pli_17792_g1
Metabolism	Metabolism of cofactors and vitamins	Retinol metabolism	ko00830	16	Pli_18175_g1,Pli_18898_g1,Pli_17407_g1,Pli_7718_g1,Pli_18777_g1,Pli_21098_g1,Pli_16293_g1,Pli_9071_g1,Pli_80_g1,Pli_7728_g1,Pli_12198_g1,Pli_18746_g1,Pli_534_g1,Pli_3563_g1,Pli_2239_g1,Pli_17737_g1
Metabolism	Metabolism of cofactors and vitamins	Riboflavin metabolism	ko00740	8	Pli_8172_g1,Pli_6506_g1,Pli_21180_g1,Pli_20406_g1,Pli_10180_g1,Pli_5784_g1,Pli_7656_g1,Pli_10027_g1
Metabolism	Metabolism of cofactors and vitamins	Thiamine metabolism	ko00730	3	Pli_1465_g1,Pli_18316_g1,Pli_12529_g1
Metabolism	Metabolism of cofactors and vitamins	Ubiquinone and other terpenoid-quinone biosynthesis	ko00130	15	Pli_5515_g1,Pli_2518_g1,Pli_9839_g1,Pli_1906_g1,Pli_4143_g1,Pli_10708_g1,Pli_17664_g1,Pli_15071_g1,Pli_6560_g1,Pli_12878_g1,Pli_2452_g1,Pli_15770_g1,Pli_15747_g1,Pli_16661_g1,Pli_8772_g1
Metabolism	Metabolism of cofactors and vitamins	Vitamin B6 metabolism	ko00750	4	Pli_3338_g1,Pli_13101_g1,Pli_15438_g1,Pli_19265_g1
Metabolism	Metabolism of other amino acids	Cyanoamino acid metabolism	ko00460	26	Pli_11470_g1,Pli_13974_g1,Pli_20041_g1,Pli_12080_g1,Pli_7266_g1,Pli_3903_g1,Pli_10177_g1,Pli_3849_g1,Pli_6291_g1,Pli_11107_g1,Pli_3188_g2,Pli_3849_g2,Pli_16737_g1,Pli_6626_g1,Pli_3835_g1,Pli_8496_g1,Pli_3188_g1,Pli_1284_g1,Pli_15718_g1,Pli_19580_g1,Pli_4334_g1,Pli_10286_g1,Pli_616_g1,Pli_15854_g1,Pli_16100_g1,Pli_17301_g1
Metabolism	Metabolism of other amino acids	D-Arginine and D-ornithine metabolism	ko00472	1	Pli_3001_g1
Metabolism	Metabolism of other amino acids	Glutathione metabolism	ko00480	35	Pli_6100_g2,Pli_18783_g1,Pli_4742_g3,Pli_19039_g1,Pli_14816_g1,Pli_12609_g1,Pli_1170_g1,Pli_5824_g1,Pli_1817_g1,Pli_10184_g1,Pli_12946_g1,Pli_19923_g1,Pli_18577_g1,Pli_15718_g1,Pli_13161_g1,Pli_15156_g1,Pli_14900_g1,Pli_38_g1,Pli_17943_g1,Pli_20588_g1,Pli_19056_g1,Pli_10369_g1,Pli_18219_g1,Pli_20051_g1,Pli_5457_g1,Pli_13039_g1,Pli_20054_g1,Pli_5824_g2,Pli_4742_g1,Pli_2311_g1,Pli_7590_g1,Pli_1022_…
Metabolism	Metabolism of other amino acids	Phosphonate and phosphinate metabolism	ko00440	1	Pli_313_g1
Metabolism	Metabolism of other amino acids	Selenocompound metabolism	ko00450	18	Pli_7745_g1,Pli_12546_g1,Pli_6566_g1,Pli_15045_g1,Pli_20692_g1,Pli_14988_g1,Pli_4464_g1,Pli_20986_g1,Pli_260_g1,Pli_16582_g1,Pli_51_g1,Pli_18995_g1,Pli_17950_g1,Pli_18833_g1,Pli_22436_g1,Pli_5417_g1,Pli_17822_g1,Pli_9813_g1
Metabolism	Metabolism of other amino acids	Taurine and hypotaurine metabolism	ko00430	12	Pli_3886_g1,Pli_6320_g1,Pli_8709_g1,Pli_1364_g1,Pli_3906_g1,Pli_15718_g1,Pli_14928_g1,Pli_7786_g1,Pli_6200_g3,Pli_18874_g1,Pli_4943_g1,Pli_4505_g1
Metabolism	Metabolism of other amino acids	beta-Alanine metabolism	ko00410	29	Pli_1635_g1,Pli_12540_g1,Pli_6145_g1,Pli_1622_g1,Pli_14152_g1,Pli_8159_g1,Pli_19990_g1,Pli_18547_g1,Pli_15685_g1,Pli_1178_g1,Pli_9509_g1,Pli_3846_g1,Pli_8709_g1,Pli_9972_g1,Pli_18171_g1,Pli_20247_g1,Pli_8760_g1,Pli_20759_g1,Pli_8390_g1,Pli_11613_g1,Pli_13039_g1,Pli_4313_g1,Pli_8416_g1,Pli_7264_g1,Pli_14894_g1,Pli_9891_g1,Pli_10129_g1,Pli_5883_g1,Pli_15340_g1
Metabolism	Metabolism of terpenoids and polyketides	Biosynthesis of ansamycins	ko01051	2	Pli_21539_g1,Pli_9855_g1
Metabolism	Metabolism of terpenoids and polyketides	Biosynthesis of siderophore group nonribosomal peptides	ko01053	1	Pli_19767_g1
Metabolism	Metabolism of terpenoids and polyketides	Brassinosteroid biosynthesis	ko00905	1	Pli_18685_g1
Metabolism	Metabolism of terpenoids and polyketides	Diterpenoid biosynthesis	ko00904	3	Pli_6013_g1,Pli_3788_g1,Pli_3126_g1
Metabolism	Metabolism of terpenoids and polyketides	Geraniol degradation	ko00281	3	Pli_10668_g1,Pli_12398_g1,Pli_12376_g1
Metabolism	Metabolism of terpenoids and polyketides	Limonene and pinene degradation	ko00903	12	Pli_9972_g1,Pli_15340_g1,Pli_16154_g1,Pli_8760_g1,Pli_5883_g1,Pli_10867_g1,Pli_18905_g1,Pli_9509_g1,Pli_4313_g1,Pli_18547_g1,Pli_19990_g1,Pli_1635_g1
Metabolism	Metabolism of terpenoids and polyketides	Nonribosomal peptide structures	ko01054	2	Pli_1802_g2,Pli_16565_g1
Metabolism	Metabolism of terpenoids and polyketides	Terpenoid backbone biosynthesis	ko00900	16	Pli_3046_g1,Pli_6835_g1,Pli_15182_g1,Pli_426_g1,Pli_8975_g1,Pli_15704_g1,Pli_1806_g1,Pli_7913_g1,Pli_7500_g1,Pli_15573_g1,Pli_16698_g1,Pli_22044_g1,Pli_17508_g1,Pli_13664_g1,Pli_14862_g1,Pli_7606_g1
Metabolism	Nucleotide metabolism	Purine metabolism	ko00230	109	Pli_197_g1,Pli_13831_g1,Pli_10231_g1,Pli_9796_g1,Pli_7733_g1,Pli_20484_g1,Pli_1367_g1,Pli_1170_g1,Pli_6093_g2,Pli_1845_g1,Pli_5717_g2,Pli_5490_g1,Pli_7036_g1,Pli_8059_g1,Pli_7475_g1,Pli_13122_g1,Pli_19477_g1,Pli_1122_g1,Pli_19686_g1,Pli_6566_g1,Pli_15669_g1,Pli_4336_g1,Pli_15400_g1,Pli_1138_g1,Pli_5319_g1,Pli_1508_g1,Pli_12946_g1,Pli_16384_g1,Pli_8191_g1,Pli_3932_g1,Pli_17603_g1,Pli_7661_g1,Pli_7…
Metabolism	Nucleotide metabolism	Pyrimidine metabolism	ko00240	68	Pli_5160_g1,Pli_2554_g1,Pli_6532_g1,Pli_10589_g1,Pli_9817_g1,Pli_5753_g2,Pli_12679_g1,Pli_841_g1,Pli_22261_g1,Pli_9904_g1,Pli_8991_g1,Pli_3727_g1,Pli_21069_g1,Pli_2809_g1,Pli_4775_g2,Pli_1718_g1,Pli_20228_g1,Pli_19218_g1,Pli_15543_g1,Pli_4742_g3,Pli_2416_g1,Pli_19318_g1,Pli_9964_g1,Pli_2139_g1,Pli_7686_g1,Pli_17941_g1,Pli_1612_g1,Pli_4468_g1,Pli_18045_g1,Pli_8832_g1,Pli_5588_g1,Pli_11091_g1,Pli_1…
Metabolism	Overview	2-Oxocarboxylic acid metabolism	ko01210	28	Pli_13812_g1,Pli_15156_g1,Pli_17042_g1,Pli_15771_g1,Pli_12528_g1,Pli_4019_g1,Pli_15551_g1,Pli_8131_g1,Pli_9646_g1,Pli_15011_g1,Pli_6240_g2,Pli_6884_g1,Pli_12652_g1,Pli_10258_g1,Pli_7741_g1,Pli_1022_g1,Pli_15644_g1,Pli_15521_g1,Pli_5003_g2,Pli_2782_g1,Pli_9664_g1,Pli_6576_g1,Pli_7303_g1,Pli_15064_g1,Pli_7401_g1,Pli_15297_g1,Pli_20372_g1,Pli_10725_g1
Metabolism	Overview	Biosynthesis of amino acids	ko01230	173	Pli_5063_g3,Pli_20188_g1,Pli_20037_g1,Pli_20245_g1,Pli_9911_g1,Pli_7156_g1,Pli_3188_g1,Pli_4991_g3,Pli_5063_g2,Pli_12528_g1,Pli_15011_g1,Pli_13229_g1,Pli_6884_g1,Pli_1022_g1,Pli_1796_g2,Pli_1869_g1,Pli_4597_g1,Pli_15521_g1,Pli_21319_g1,Pli_13101_g1,Pli_18050_g1,Pli_12546_g1,Pli_15297_g1,Pli_20393_g1,Pli_9869_g1,Pli_20441_g1,Pli_5396_g1,Pli_684_g1,Pli_18017_g1,Pli_15071_g1,Pli_9855_g1,Pli_17950_g1…
Metabolism	Overview	Carbon metabolism	ko01200	156	Pli_9891_g1,Pli_15147_g1,Pli_1560_g1,Pli_4336_g1,Pli_9781_g1,Pli_987_g2,Pli_8390_g1,Pli_18049_g1,Pli_13191_g1,Pli_3634_g1,Pli_4130_g1,Pli_5935_g1,Pli_16424_g1,Pli_13007_g1,Pli_9173_g1,Pli_4221_g1,Pli_12601_g1,Pli_19580_g1,Pli_17830_g1,Pli_18783_g1,Pli_7733_g1,Pli_1969_g1,Pli_21333_g1,Pli_9866_g1,Pli_12505_g1,Pli_3703_g1,Pli_1750_g1,Pli_1649_g2,Pli_18523_g1,Pli_7804_g1,Pli_5470_g1,Pli_11147_g1,Pli…
Metabolism	Overview	Degradation of aromatic compounds	ko01220	13	Pli_17737_g1,Pli_16293_g1,Pli_9071_g1,Pli_9659_g1,Pli_80_g1,Pli_3102_g1,Pli_21098_g1,Pli_11451_g1,Pli_18898_g1,Pli_2714_g1,Pli_3563_g1,Pli_18746_g1,Pli_18175_g1
Metabolism	Overview	Fatty acid metabolism	ko01212	54	Pli_1860_g1,Pli_21023_g1,Pli_7482_g1,Pli_13947_g1,Pli_1341_g1,Pli_7128_g1,Pli_20742_g1,Pli_7015_g1,Pli_17868_g1,Pli_12445_g1,Pli_7015_g2,Pli_7015_g3,Pli_13680_g1,Pli_2064_g1,Pli_7067_g1,Pli_13079_g1,Pli_1300_g1,Pli_6216_g1,Pli_12756_g1,Pli_8390_g1,Pli_10306_g1,Pli_11716_g1,Pli_20177_g1,Pli_17456_g1,Pli_7598_g1,Pli_20247_g1,Pli_19563_g1,Pli_3785_g1,Pli_8890_g1,Pli_15093_g1,Pli_2359_g1,Pli_4059_g1,…
Metabolism	Xenobiotics biodegradation and metabolism	Aminobenzoate degradation	ko00627	7	Pli_3968_g1,Pli_16154_g1,Pli_9779_g1,Pli_8390_g1,Pli_3846_g1,Pli_10867_g1,Pli_18905_g1
Metabolism	Xenobiotics biodegradation and metabolism	Benzoate degradation	ko00362	8	Pli_8643_g1,Pli_7128_g1,Pli_8390_g1,Pli_20177_g1,Pli_10668_g1,Pli_7598_g1,Pli_10867_g1,Pli_3846_g1
Metabolism	Xenobiotics biodegradation and metabolism	Bisphenol degradation	ko00363	3	Pli_16154_g1,Pli_13836_g1,Pli_18905_g1
Metabolism	Xenobiotics biodegradation and metabolism	Caprolactam degradation	ko00930	5	Pli_3846_g1,Pli_11451_g1,Pli_12398_g1,Pli_8390_g1,Pli_3102_g1
Metabolism	Xenobiotics biodegradation and metabolism	Chloroalkane and chloroalkene degradation	ko00625	23	Pli_18252_g1,Pli_21098_g1,Pli_4313_g1,Pli_80_g1,Pli_16293_g1,Pli_9071_g1,Pli_18175_g1,Pli_8460_g1,Pli_15340_g1,Pli_18898_g1,Pli_5883_g1,Pli_19990_g1,Pli_18547_g1,Pli_19095_g1,Pli_20147_g1,Pli_1635_g1,Pli_17737_g1,Pli_8760_g1,Pli_18746_g1,Pli_9972_g1,Pli_9509_g1,Pli_13836_g1,Pli_3563_g1
Metabolism	Xenobiotics biodegradation and metabolism	Drug metabolism - cytochrome P450	ko00982	20	Pli_18219_g1,Pli_3563_g1,Pli_12198_g1,Pli_18746_g1,Pli_14152_g1,Pli_17737_g1,Pli_2162_g1,Pli_13161_g1,Pli_14800_g1,Pli_18898_g1,Pli_20207_g1,Pli_18175_g1,Pli_80_g1,Pli_5457_g1,Pli_16293_g1,Pli_9071_g1,Pli_21098_g1,Pli_5824_g2,Pli_2311_g1,Pli_5824_g1
Metabolism	Xenobiotics biodegradation and metabolism	Drug metabolism - other enzymes	ko00983	11	Pli_13273_g1,Pli_12198_g1,Pli_1612_g1,Pli_7542_g1,Pli_7234_g1,Pli_18045_g1,Pli_21069_g1,Pli_8832_g1,Pli_197_g1,Pli_2554_g1,Pli_5627_g1
Metabolism	Xenobiotics biodegradation and metabolism	Ethylbenzene degradation	ko00642	2	Pli_10867_g1,Pli_10668_g1
Metabolism	Xenobiotics biodegradation and metabolism	Metabolism of xenobiotics by cytochrome P450	ko00980	25	Pli_13161_g1,Pli_2251_g1,Pli_2162_g1,Pli_17737_g1,Pli_17616_g1,Pli_14152_g1,Pli_12198_g1,Pli_18746_g1,Pli_3563_g1,Pli_2738_g1,Pli_18219_g1,Pli_5868_g1,Pli_2311_g1,Pli_5824_g2,Pli_5824_g1,Pli_21098_g1,Pli_16293_g1,Pli_5457_g1,Pli_9071_g1,Pli_80_g1,Pli_15687_g1,Pli_20207_g1,Pli_18175_g1,Pli_18898_g1,Pli_14800_g1
Metabolism	Xenobiotics biodegradation and metabolism	Naphthalene degradation	ko00626	9	Pli_80_g1,Pli_17737_g1,Pli_16293_g1,Pli_9071_g1,Pli_21098_g1,Pli_18898_g1,Pli_3563_g1,Pli_18746_g1,Pli_18175_g1
Metabolism	Xenobiotics biodegradation and metabolism	Polycyclic aromatic hydrocarbon degradation	ko00624	5	Pli_16154_g1,Pli_4310_g1,Pli_18905_g1,Pli_20988_g1,Pli_20838_g1
Metabolism	Xenobiotics biodegradation and metabolism	Styrene degradation	ko00643	2	Pli_10300_g1,Pli_292_g1
Organismal Systems	Circulatory system	Adrenergic signaling in cardiomyocytes	ko04261	90	Pli_1174_g1,Pli_3828_g1,Pli_16939_g1,Pli_15472_g1,Pli_5740_g3,Pli_4439_g3,Pli_6240_g1,Pli_6055_g2,Pli_717_g1,Pli_538_g1,Pli_8624_g1,Pli_4439_g2,Pli_12848_g1,Pli_12165_g1,Pli_1340_g1,Pli_9356_g1,Pli_5740_g1,Pli_21197_g1,Pli_17514_g1,Pli_405_g1,Pli_4527_g2,Pli_7424_g1,Pli_5019_g1,Pli_1218_g1,Pli_5798_g1,Pli_19437_g1,Pli_4439_g1,Pli_10083_g1,Pli_9729_g1,Pli_15001_g1,Pli_12608_g1,Pli_17708_g1,Pli_155…
Organismal Systems	Circulatory system	Cardiac muscle contraction	ko04260	28	Pli_20704_g1,Pli_8467_g1,Pli_7523_g1,Pli_9356_g1,Pli_15925_g1,Pli_18744_g1,Pli_9023_g1,Pli_22462_g1,Pli_9731_g1,Pli_13311_g1,Pli_4527_g1,Pli_12501_g1,Pli_3136_g1,Pli_18097_g1,Pli_5251_g2,Pli_12912_g1,Pli_16152_g1,Pli_4682_g2,Pli_1251_g1,Pli_7240_g1,Pli_11346_g1,Pli_21726_g1,Pli_10046_g1,Pli_18916_g1,Pli_16939_g1,Pli_4527_g2,Pli_6706_g2,Pli_7424_g1
Organismal Systems	Circulatory system	Vascular smooth muscle contraction	ko04270	55	Pli_13363_g1,Pli_19437_g1,Pli_16429_g1,Pli_21126_g1,Pli_5019_g1,Pli_1218_g1,Pli_5798_g1,Pli_18916_g1,Pli_21197_g1,Pli_6286_g1,Pli_6376_g1,Pli_405_g1,Pli_12608_g1,Pli_9632_g1,Pli_15663_g1,Pli_9729_g1,Pli_269_g1,Pli_21728_g1,Pli_7765_g1,Pli_7615_g1,Pli_1845_g1,Pli_13777_g1,Pli_19053_g1,Pli_18646_g1,Pli_15126_g1,Pli_17810_g1,Pli_2026_g1,Pli_1194_g1,Pli_17985_g1,Pli_2144_g1,Pli_16702_g1,Pli_12518_g1,…
Organismal Systems	Development	Axon guidance	ko04360	37	Pli_1194_g1,Pli_22524_g1,Pli_2144_g1,Pli_17985_g1,Pli_14430_g1,Pli_7615_g1,Pli_6970_g1,Pli_12608_g1,Pli_14330_g1,Pli_4439_g1,Pli_19800_g1,Pli_5019_g1,Pli_1218_g1,Pli_5798_g1,Pli_14896_g1,Pli_6376_g1,Pli_6286_g1,Pli_4247_g2,Pli_1011_g1,Pli_17098_g1,Pli_1637_g1,Pli_8792_g1,Pli_4439_g2,Pli_7558_g1,Pli_10443_g1,Pli_13388_g1,Pli_9262_g1,Pli_6240_g1,Pli_1856_g1,Pli_18525_g1,Pli_4439_g3,Pli_12559_g1,Pli…
Organismal Systems	Development	Dorso-ventral axis formation	ko04320	20	Pli_6376_g1,Pli_6286_g1,Pli_1218_g1,Pli_12518_g1,Pli_5798_g1,Pli_5019_g1,Pli_2522_g1,Pli_12559_g1,Pli_6240_g1,Pli_19857_g1,Pli_12608_g1,Pli_7615_g1,Pli_7765_g1,Pli_21728_g1,Pli_17985_g1,Pli_2144_g1,Pli_1194_g1,Pli_3500_g1,Pli_1637_g1,Pli_19053_g1
Organismal Systems	Development	Osteoclast differentiation	ko04380	63	Pli_10619_g1,Pli_2020_g1,Pli_17985_g1,Pli_2144_g1,Pli_12869_g1,Pli_19053_g1,Pli_12075_g1,Pli_12954_g1,Pli_22524_g1,Pli_1194_g1,Pli_22468_g1,Pli_7615_g1,Pli_19509_g1,Pli_22471_g1,Pli_612_g1,Pli_17690_g1,Pli_21728_g1,Pli_14430_g1,Pli_7765_g1,Pli_19800_g1,Pli_12608_g1,Pli_6970_g1,Pli_19857_g1,Pli_22503_g1,Pli_6286_g1,Pli_9304_g1,Pli_6376_g1,Pli_5798_g1,Pli_1218_g1,Pli_5019_g1,Pli_14896_g1,Pli_3290_g…
Organismal Systems	Digestive system	Bile secretion	ko04976	61	Pli_16429_g1,Pli_19437_g1,Pli_6706_g2,Pli_4527_g2,Pli_7424_g1,Pli_2833_g1,Pli_22044_g1,Pli_5318_g2,Pli_21461_g1,Pli_5483_g1,Pli_7601_g1,Pli_9554_g1,Pli_405_g1,Pli_9239_g1,Pli_17053_g1,Pli_3605_g1,Pli_360_g1,Pli_13343_g1,Pli_15663_g1,Pli_14936_g1,Pli_6965_g1,Pli_4527_g1,Pli_4044_g1,Pli_1301_g1,Pli_21783_g1,Pli_4140_g1,Pli_269_g1,Pli_14780_g1,Pli_20119_g1,Pli_11552_g1,Pli_6764_g3,Pli_21300_g1,Pli_1…
Organismal Systems	Digestive system	Carbohydrate digestion and absorption	ko04973	23	Pli_9731_g1,Pli_538_g1,Pli_17690_g1,Pli_8179_g1,Pli_612_g1,Pli_22471_g1,Pli_3334_g1,Pli_1266_g1,Pli_1340_g1,Pli_504_g1,Pli_2020_g1,Pli_3296_g1,Pli_8467_g1,Pli_7424_g1,Pli_16939_g1,Pli_4527_g2,Pli_6706_g2,Pli_22004_g1,Pli_10259_g1,Pli_5251_g2,Pli_6414_g1,Pli_4527_g1,Pli_963_g1
Organismal Systems	Digestive system	Fat digestion and absorption	ko04975	8	Pli_22349_g1,Pli_9646_g1,Pli_15297_g1,Pli_16717_g1,Pli_8895_g1,Pli_6614_g2,Pli_17053_g1,Pli_9239_g1
Organismal Systems	Digestive system	Gastric acid secretion	ko04971	31	Pli_16939_g1,Pli_4527_g2,Pli_7424_g1,Pli_6706_g2,Pli_19437_g1,Pli_16429_g1,Pli_21197_g1,Pli_17514_g1,Pli_405_g1,Pli_4439_g3,Pli_5251_g2,Pli_4454_g1,Pli_15663_g1,Pli_4439_g1,Pli_4527_g1,Pli_269_g1,Pli_717_g1,Pli_9731_g1,Pli_8520_g1,Pli_17708_g1,Pli_15559_g1,Pli_13777_g1,Pli_12165_g1,Pli_18646_g1,Pli_2026_g1,Pli_3647_g1,Pli_18938_g1,Pli_8467_g1,Pli_4439_g2,Pli_8624_g1,Pli_3111_g1
Organismal Systems	Digestive system	Mineral absorption	ko04978	22	Pli_946_g1,Pli_4821_g1,Pli_1662_g1,Pli_4527_g1,Pli_17364_g1,Pli_17718_g1,Pli_5251_g2,Pli_17076_g1,Pli_13_g2,Pli_15109_g1,Pli_16939_g1,Pli_4527_g2,Pli_6706_g2,Pli_7424_g1,Pli_13_g1,Pli_8467_g1,Pli_318_g1,Pli_4984_g1,Pli_20504_g1,Pli_9731_g1,Pli_1020_g1,Pli_8009_g1
Organismal Systems	Digestive system	Pancreatic secretion	ko04972	33	Pli_17676_g1,Pli_8467_g1,Pli_5740_g4,Pli_8933_g1,Pli_4527_g1,Pli_20445_g1,Pli_19800_g1,Pli_20365_g1,Pli_405_g1,Pli_6706_g2,Pli_4527_g2,Pli_14896_g1,Pli_7424_g1,Pli_19437_g1,Pli_12848_g1,Pli_3111_g1,Pli_5740_g1,Pli_19536_g1,Pli_17098_g1,Pli_9298_g1,Pli_15186_g1,Pli_5740_g2,Pli_9731_g1,Pli_277_g1,Pli_12194_g1,Pli_5740_g3,Pli_12544_g1,Pli_20898_g1,Pli_5251_g2,Pli_1174_g1,Pli_16939_g1,Pli_15472_g1,Pl…
Organismal Systems	Digestive system	Protein digestion and absorption	ko04974	17	Pli_4718_g1,Pli_9437_g1,Pli_9731_g1,Pli_8467_g1,Pli_16892_g1,Pli_19382_g1,Pli_15353_g1,Pli_20544_g1,Pli_4527_g2,Pli_16939_g1,Pli_6706_g2,Pli_7424_g1,Pli_22548_g1,Pli_2903_g2,Pli_5176_g1,Pli_4527_g1,Pli_5251_g2
Organismal Systems	Digestive system	Salivary secretion	ko04970	41	Pli_1174_g1,Pli_16592_g1,Pli_15472_g1,Pli_16939_g1,Pli_5740_g3,Pli_20898_g1,Pli_12213_g1,Pli_5251_g2,Pli_4454_g1,Pli_5740_g2,Pli_717_g1,Pli_9731_g1,Pli_14076_g1,Pli_12848_g1,Pli_3111_g1,Pli_8624_g1,Pli_18938_g1,Pli_3647_g1,Pli_5740_g1,Pli_15186_g1,Pli_21989_g1,Pli_12165_g1,Pli_405_g1,Pli_21197_g1,Pli_1040_g1,Pli_16429_g1,Pli_19437_g1,Pli_4527_g2,Pli_7424_g1,Pli_6706_g2,Pli_4527_g1,Pli_15663_g1,Pl…
Organismal Systems	Digestive system	Vitamin digestion and absorption	ko04977	9	Pli_4125_g1,Pli_13211_g1,Pli_13510_g1,Pli_7592_g1,Pli_5902_g1,Pli_2767_g1,Pli_20627_g1,Pli_18308_g1,Pli_6154_g1
Organismal Systems	Endocrine system	Adipocytokine signaling pathway	ko04920	44	Pli_3277_g1,Pli_22471_g1,Pli_6216_g1,Pli_612_g1,Pli_9854_g1,Pli_4140_g1,Pli_5645_g2,Pli_17690_g1,Pli_7031_g1,Pli_22387_g1,Pli_2020_g1,Pli_12445_g1,Pli_1269_g2,Pli_3673_g1,Pli_1341_g1,Pli_9543_g1,Pli_1301_g1,Pli_6136_g1,Pli_20896_g1,Pli_5623_g1,Pli_5566_g1,Pli_21772_g1,Pli_12421_g1,Pli_1266_g1,Pli_4030_g2,Pli_538_g1,Pli_3296_g1,Pli_20730_g1,Pli_1340_g1,Pli_504_g1,Pli_2116_g2,Pli_6354_g1,Pli_14315_…
Organismal Systems	Endocrine system	Estrogen signaling pathway	ko04915	87	Pli_12262_g1,Pli_1266_g1,Pli_4261_g1,Pli_18938_g1,Pli_3647_g1,Pli_4320_g1,Pli_3296_g1,Pli_3111_g1,Pli_4261_g3,Pli_2721_g1,Pli_12746_g1,Pli_1672_g1,Pli_504_g1,Pli_1486_g1,Pli_1637_g1,Pli_9484_g1,Pli_10259_g1,Pli_19128_g1,Pli_12518_g1,Pli_12559_g1,Pli_6414_g1,Pli_2522_g1,Pli_15164_g1,Pli_5624_g1,Pli_4454_g1,Pli_612_g1,Pli_17473_g1,Pli_19184_g1,Pli_7615_g1,Pli_269_g1,Pli_21728_g1,Pli_17690_g1,Pli_12…
Organismal Systems	Endocrine system	GnRH signaling pathway	ko04912	48	Pli_21728_g1,Pli_18941_g1,Pli_269_g1,Pli_7765_g1,Pli_15559_g1,Pli_7615_g1,Pli_17708_g1,Pli_13777_g1,Pli_19053_g1,Pli_18646_g1,Pli_19246_g1,Pli_1194_g1,Pli_2026_g1,Pli_2144_g1,Pli_17985_g1,Pli_1218_g1,Pli_5798_g1,Pli_18916_g1,Pli_5019_g1,Pli_19437_g1,Pli_16429_g1,Pli_17514_g1,Pli_6286_g1,Pli_21197_g1,Pli_405_g1,Pli_6376_g1,Pli_12608_g1,Pli_19857_g1,Pli_15663_g1,Pli_8520_g1,Pli_717_g1,Pli_1637_g1,P…
Organismal Systems	Endocrine system	Insulin secretion	ko04911	29	Pli_12165_g1,Pli_18646_g1,Pli_8624_g1,Pli_8467_g1,Pli_269_g1,Pli_4140_g1,Pli_9731_g1,Pli_8520_g1,Pli_17708_g1,Pli_15559_g1,Pli_5251_g2,Pli_4454_g1,Pli_9897_g1,Pli_2903_g2,Pli_963_g1,Pli_15663_g1,Pli_1301_g1,Pli_4527_g1,Pli_4527_g2,Pli_16939_g1,Pli_6706_g2,Pli_7424_g1,Pli_19437_g1,Pli_16429_g1,Pli_18916_g1,Pli_11346_g1,Pli_17514_g1,Pli_4682_g2,Pli_405_g1
Organismal Systems	Endocrine system	Insulin signaling pathway	ko04910	106	Pli_13160_g1,Pli_5832_g2,Pli_12716_g1,Pli_6240_g1,Pli_3828_g1,Pli_18520_g1,Pli_3177_g1,Pli_1420_g1,Pli_17685_g1,Pli_8624_g1,Pli_1340_g1,Pli_12165_g1,Pli_6354_g1,Pli_4351_g1,Pli_17486_g1,Pli_538_g1,Pli_717_g1,Pli_903_g1,Pli_9729_g1,Pli_12608_g1,Pli_6136_g1,Pli_19857_g1,Pli_20881_g1,Pli_21197_g1,Pli_1269_g2,Pli_16000_g1,Pli_1218_g1,Pli_5011_g1,Pli_5798_g1,Pli_5019_g1,Pli_13526_g1,Pli_22387_g1,Pli_6…
Organismal Systems	Endocrine system	Melanogenesis	ko04916	51	Pli_5603_g1,Pli_717_g1,Pli_5567_g1,Pli_5873_g1,Pli_8520_g1,Pli_3647_g1,Pli_18938_g1,Pli_8624_g1,Pli_4439_g2,Pli_2721_g1,Pli_12165_g1,Pli_1637_g1,Pli_7272_g1,Pli_12518_g1,Pli_2522_g1,Pli_12559_g1,Pli_6240_g1,Pli_14466_g1,Pli_4439_g3,Pli_4454_g1,Pli_13777_g1,Pli_14480_g1,Pli_7615_g1,Pli_15559_g1,Pli_17708_g1,Pli_7765_g1,Pli_589_g2,Pli_269_g1,Pli_21728_g1,Pli_833_g1,Pli_17985_g1,Pli_2144_g1,Pli_2026…
Organismal Systems	Endocrine system	Ovarian Steroidogenesis	ko04913	9	Pli_405_g1,Pli_19437_g1,Pli_16429_g1,Pli_269_g1,Pli_15663_g1,Pli_8624_g1,Pli_4454_g1,Pli_18646_g1,Pli_12165_g1
Organismal Systems	Endocrine system	Oxytocin signaling pathway	ko04921	102	Pli_6240_g1,Pli_4439_g3,Pli_3867_g1,Pli_7224_g1,Pli_3828_g1,Pli_4962_g1,Pli_6789_g1,Pli_8624_g1,Pli_4439_g2,Pli_17098_g1,Pli_6354_g1,Pli_12165_g1,Pli_10443_g1,Pli_1595_g1,Pli_717_g1,Pli_9729_g1,Pli_4439_g1,Pli_9643_g1,Pli_18460_g1,Pli_12608_g1,Pli_1269_g2,Pli_405_g1,Pli_19772_g1,Pli_21197_g1,Pli_17514_g1,Pli_10017_g1,Pli_1218_g1,Pli_19437_g1,Pli_5798_g1,Pli_5019_g1,Pli_16702_g1,Pli_22387_g1,Pli_1…
Organismal Systems	Endocrine system	PPAR signaling pathway	ko03320	44	Pli_6505_g1,Pli_19763_g1,Pli_3719_g1,Pli_20730_g1,Pli_18643_g1,Pli_2116_g2,Pli_12421_g1,Pli_20120_g1,Pli_19960_g1,Pli_15093_g1,Pli_8890_g1,Pli_20247_g1,Pli_19563_g1,Pli_2382_g1,Pli_7598_g1,Pli_15314_g1,Pli_14315_g1,Pli_2116_g1,Pli_15685_g1,Pli_58_g1,Pli_20253_g1,Pli_2064_g1,Pli_6848_g2,Pli_5077_g1,Pli_7015_g3,Pli_7963_g1,Pli_7015_g2,Pli_11824_g1,Pli_6216_g1,Pli_2979_g1,Pli_13079_g1,Pli_3573_g1,Pl…
Organismal Systems	Endocrine system	Progesterone-mediated oocyte maturation	ko04914	76	Pli_20995_g1,Pli_2733_g1,Pli_4439_g3,Pli_6240_g1,Pli_15165_g1,Pli_18520_g1,Pli_8197_g1,Pli_4439_g2,Pli_8624_g1,Pli_1340_g1,Pli_12165_g1,Pli_9255_g1,Pli_7170_g1,Pli_17299_g1,Pli_538_g1,Pli_8944_g1,Pli_4439_g1,Pli_22556_g1,Pli_12608_g1,Pli_6736_g1,Pli_1218_g1,Pli_5798_g1,Pli_5019_g1,Pli_13107_g1,Pli_15716_g1,Pli_18646_g1,Pli_4094_g1,Pli_12721_g1,Pli_1194_g1,Pli_22471_g1,Pli_2120_g1,Pli_7765_g1,Pli_…
Organismal Systems	Endocrine system	Prolactin signaling pathway	ko04917	42	Pli_2721_g1,Pli_1637_g1,Pli_504_g1,Pli_1340_g1,Pli_3296_g1,Pli_538_g1,Pli_22487_g1,Pli_1266_g1,Pli_16764_g1,Pli_6240_g1,Pli_12559_g1,Pli_2522_g1,Pli_6414_g1,Pli_9523_g1,Pli_7272_g1,Pli_12518_g1,Pli_10541_g1,Pli_10259_g1,Pli_1194_g1,Pli_19053_g1,Pli_12075_g1,Pli_21120_g1,Pli_2020_g1,Pli_17985_g1,Pli_2144_g1,Pli_7765_g1,Pli_17690_g1,Pli_10447_g1,Pli_5645_g2,Pli_21728_g1,Pli_612_g1,Pli_22471_g1,Pli_…
Organismal Systems	Endocrine system	Renin-angiotensin system	ko04614	3	Pli_13380_g1,Pli_10414_g1,Pli_12882_g1
Organismal Systems	Endocrine system	Thyroid hormone signaling pathway	ko04919	85	Pli_9897_g1,Pli_6240_g1,Pli_7862_g1,Pli_16939_g1,Pli_6789_g1,Pli_10541_g1,Pli_8624_g1,Pli_21176_g1,Pli_12165_g1,Pli_1340_g1,Pli_4735_g1,Pli_1595_g1,Pli_538_g1,Pli_9643_g1,Pli_6851_g1,Pli_1301_g1,Pli_12608_g1,Pli_6136_g1,Pli_19772_g1,Pli_5019_g1,Pli_5011_g1,Pli_1218_g1,Pli_5798_g1,Pli_4527_g2,Pli_7424_g1,Pli_10017_g1,Pli_6848_g2,Pli_5077_g1,Pli_18646_g1,Pli_1194_g1,Pli_12936_g1,Pli_14480_g1,Pli_22…
Organismal Systems	Endocrine system	Thyroid hormone synthesis	ko04918	42	Pli_13286_g1,Pli_16707_g1,Pli_4527_g1,Pli_15663_g1,Pli_6706_g2,Pli_4527_g2,Pli_7424_g1,Pli_16429_g1,Pli_19437_g1,Pli_21594_g1,Pli_14790_g1,Pli_6100_g2,Pli_405_g1,Pli_8733_g1,Pli_18646_g1,Pli_11562_g1,Pli_106_g1,Pli_8467_g1,Pli_269_g1,Pli_14816_g1,Pli_9212_g1,Pli_12609_g1,Pli_4454_g1,Pli_5251_g2,Pli_2676_g2,Pli_38_g1,Pli_19056_g1,Pli_19128_g1,Pli_16939_g1,Pli_22163_g1,Pli_106_g2,Pli_7457_g1,Pli_27…
Organismal Systems	Environmental adaptation	Circadian entrainment	ko04713	52	Pli_13690_g1,Pli_14076_g1,Pli_717_g1,Pli_2493_g1,Pli_8520_g1,Pli_3647_g1,Pli_18938_g1,Pli_4439_g2,Pli_8624_g1,Pli_3111_g1,Pli_12165_g1,Pli_21989_g1,Pli_1637_g1,Pli_11346_g1,Pli_12518_g1,Pli_6457_g1,Pli_897_g1,Pli_16592_g1,Pli_12559_g1,Pli_2522_g1,Pli_4439_g3,Pli_4454_g1,Pli_12213_g1,Pli_6240_g1,Pli_7615_g1,Pli_1845_g1,Pli_17708_g1,Pli_15559_g1,Pli_13777_g1,Pli_269_g1,Pli_2144_g1,Pli_17985_g1,Pli_…
Organismal Systems	Environmental adaptation	Circadian rhythm	ko04710	16	Pli_5197_g1,Pli_5623_g1,Pli_21772_g1,Pli_1269_g2,Pli_2665_g1,Pli_20525_g1,Pli_3673_g1,Pli_12115_g1,Pli_1431_g1,Pli_18133_g1,Pli_22387_g1,Pli_5850_g1,Pli_15870_g1,Pli_6354_g1,Pli_10418_g1,Pli_3277_g1
Organismal Systems	Environmental adaptation	Circadian rhythm - fly	ko04711	1	Pli_7272_g1
Organismal Systems	Environmental adaptation	Circadian rhythm - plant	ko04712	7	Pli_4835_g1,Pli_124_g1,Pli_14786_g1,Pli_14399_g1,Pli_16995_g1,Pli_14966_g1,Pli_12785_g1
Organismal Systems	Environmental adaptation	Plant-pathogen interaction	ko04626	34	Pli_7765_g1,Pli_21728_g1,Pli_2120_g1,Pli_13777_g1,Pli_2026_g1,Pli_8733_g1,Pli_22386_g1,Pli_19053_g1,Pli_7703_g1,Pli_100_g1,Pli_195_g1,Pli_16417_g1,Pli_21197_g1,Pli_13286_g1,Pli_15299_g1,Pli_2120_g2,Pli_717_g1,Pli_17299_g1,Pli_2370_g2,Pli_7170_g1,Pli_8981_g1,Pli_9255_g1,Pli_15739_g1,Pli_17157_g1,Pli_8375_g1,Pli_18938_g1,Pli_3647_g1,Pli_9887_g1,Pli_19128_g1,Pli_10020_g1,Pli_2762_g1,Pli_9484_g1,Pli_…
Organismal Systems	Excretory system	Aldosterone-regulated sodium reabsorption	ko04960	28	Pli_1637_g1,Pli_1194_g1,Pli_17985_g1,Pli_2144_g1,Pli_8467_g1,Pli_6848_g2,Pli_5077_g1,Pli_9731_g1,Pli_7615_g1,Pli_12608_g1,Pli_5251_g2,Pli_6240_g1,Pli_4527_g1,Pli_6414_g1,Pli_12559_g1,Pli_2522_g1,Pli_1218_g1,Pli_12518_g1,Pli_5011_g1,Pli_5798_g1,Pli_5019_g1,Pli_16939_g1,Pli_7424_g1,Pli_4527_g2,Pli_6706_g2,Pli_10259_g1,Pli_6286_g1,Pli_6376_g1
Organismal Systems	Excretory system	Collecting duct acid secretion	ko04966	8	Pli_11603_g1,Pli_15077_g1,Pli_1247_g1,Pli_15621_g1,Pli_14817_g1,Pli_6841_g1,Pli_9856_g1,Pli_12846_g1
Organismal Systems	Excretory system	Endocrine and other factor-regulated calcium reabsorption	ko04961	28	Pli_13846_g1,Pli_9731_g1,Pli_21836_g1,Pli_269_g1,Pli_1937_g2,Pli_5315_g1,Pli_7647_g1,Pli_8467_g1,Pli_8624_g1,Pli_12165_g1,Pli_18646_g1,Pli_405_g1,Pli_4076_g1,Pli_19437_g1,Pli_10372_g1,Pli_16429_g1,Pli_16939_g1,Pli_7424_g1,Pli_4527_g2,Pli_6706_g2,Pli_4527_g1,Pli_12194_g1,Pli_15663_g1,Pli_14986_g1,Pli_1937_g1,Pli_5251_g2,Pli_4454_g1,Pli_9310_g1
Organismal Systems	Excretory system	Proximal tubule bicarbonate reclamation	ko04964	11	Pli_17563_g1,Pli_13191_g1,Pli_8791_g1,Pli_7424_g1,Pli_16939_g1,Pli_4527_g2,Pli_6706_g2,Pli_9731_g1,Pli_8467_g1,Pli_4527_g1,Pli_5251_g2
Organismal Systems	Excretory system	Vasopressin-regulated water reabsorption	ko04962	63	Pli_12194_g1,Pli_2262_g1,Pli_19130_g1,Pli_11452_g1,Pli_8265_g1,Pli_4811_g1,Pli_4391_g3,Pli_21022_g1,Pli_18467_g1,Pli_18071_g1,Pli_4454_g1,Pli_14010_g1,Pli_20662_g1,Pli_15612_g1,Pli_16004_g1,Pli_6764_g1,Pli_18109_g1,Pli_14828_g1,Pli_10372_g1,Pli_8624_g1,Pli_7029_g1,Pli_6900_g2,Pli_12165_g1,Pli_13893_g1,Pli_857_g1,Pli_915_g1,Pli_1033_g1,Pli_21429_g1,Pli_19846_g1,Pli_909_g1,Pli_15504_g1,Pli_15663_g1…
Organismal Systems	Immune system	Antigen processing and presentation	ko04612	63	Pli_983_g1,Pli_9214_g1,Pli_20995_g1,Pli_15164_g1,Pli_7923_g1,Pli_11708_g1,Pli_9484_g1,Pli_18778_g1,Pli_13151_g1,Pli_14809_g1,Pli_13204_g1,Pli_4320_g1,Pli_13851_g1,Pli_16640_g1,Pli_4261_g3,Pli_12746_g1,Pli_1672_g1,Pli_9255_g1,Pli_7503_g1,Pli_17648_g1,Pli_7170_g1,Pli_4261_g2,Pli_20355_g1,Pli_12262_g1,Pli_14977_g1,Pli_14968_g1,Pli_4261_g1,Pli_11622_g1,Pli_6096_g1,Pli_21364_g1,Pli_7479_g1,Pli_17299_g…
Organismal Systems	Immune system	B cell receptor signaling pathway	ko04662	49	Pli_9596_g1,Pli_16764_g1,Pli_6240_g1,Pli_13911_g1,Pli_2522_g1,Pli_6414_g1,Pli_12559_g1,Pli_19678_g1,Pli_7272_g1,Pli_12518_g1,Pli_9523_g1,Pli_10259_g1,Pli_4962_g1,Pli_1637_g1,Pli_504_g1,Pli_1340_g1,Pli_2721_g1,Pli_3296_g1,Pli_18353_g1,Pli_3655_g1,Pli_538_g1,Pli_7558_g1,Pli_1266_g1,Pli_10443_g1,Pli_12608_g1,Pli_19857_g1,Pli_6970_g1,Pli_19800_g1,Pli_1218_g1,Pli_5798_g1,Pli_5019_g1,Pli_14896_g1,Pli_4…
Organismal Systems	Immune system	Chemokine signaling pathway	ko04062	79	Pli_1266_g1,Pli_13690_g1,Pli_3707_g1,Pli_14771_g1,Pli_22045_g1,Pli_1637_g1,Pli_504_g1,Pli_2721_g1,Pli_3296_g1,Pli_9523_g1,Pli_12518_g1,Pli_7272_g1,Pli_3103_g1,Pli_19626_g1,Pli_897_g1,Pli_10259_g1,Pli_4454_g1,Pli_12544_g1,Pli_6053_g1,Pli_12559_g1,Pli_2522_g1,Pli_6414_g1,Pli_269_g1,Pli_21728_g1,Pli_5645_g2,Pli_17690_g1,Pli_7615_g1,Pli_612_g1,Pli_21574_g1,Pli_19053_g1,Pli_12075_g1,Pli_10990_g1,Pli_3…
Organismal Systems	Immune system	Complement and coagulation cascades	ko04610	25	Pli_1980_g1,Pli_14371_g1,Pli_10664_g1,Pli_4745_g1,Pli_22172_g1,Pli_14723_g1,Pli_12124_g1,Pli_22092_g1,Pli_18911_g1,Pli_1980_g2,Pli_18058_g1,Pli_2975_g2,Pli_16771_g1,Pli_1986_g1,Pli_14170_g1,Pli_1603_g1,Pli_18148_g1,Pli_1297_g1,Pli_1603_g2,Pli_4745_g2,Pli_8567_g1,Pli_22426_g1,Pli_15183_g1,Pli_14597_g1,Pli_4745_g3
Organismal Systems	Immune system	Cytosolic DNA-sensing pathway	ko04623	18	Pli_841_g1,Pli_13911_g1,Pli_16764_g1,Pli_18013_g1,Pli_1367_g1,Pli_12679_g1,Pli_7670_g1,Pli_9817_g1,Pli_15400_g1,Pli_9523_g1,Pli_19678_g1,Pli_4325_g1,Pli_15942_g1,Pli_2548_g1,Pli_1959_g1,Pli_10882_g1,Pli_11091_g1,Pli_8991_g1
Organismal Systems	Immune system	Fc epsilon RI signaling pathway	ko04664	40	Pli_12559_g1,Pli_2522_g1,Pli_6414_g1,Pli_6240_g1,Pli_9596_g1,Pli_10259_g1,Pli_12518_g1,Pli_3296_g1,Pli_2721_g1,Pli_1340_g1,Pli_504_g1,Pli_1637_g1,Pli_1266_g1,Pli_538_g1,Pli_19800_g1,Pli_19857_g1,Pli_12608_g1,Pli_6376_g1,Pli_6286_g1,Pli_4247_g2,Pli_14896_g1,Pli_5019_g1,Pli_1218_g1,Pli_5798_g1,Pli_5011_g1,Pli_5077_g1,Pli_6848_g2,Pli_2144_g1,Pli_17985_g1,Pli_2020_g1,Pli_22524_g1,Pli_1194_g1,Pli_1905…
Organismal Systems	Immune system	Fc gamma R-mediated phagocytosis	ko04666	88	Pli_17685_g1,Pli_1420_g1,Pli_6240_g1,Pli_9294_g1,Pli_2529_g1,Pli_18344_g1,Pli_1856_g1,Pli_9596_g1,Pli_5832_g2,Pli_538_g1,Pli_17486_g1,Pli_15131_g1,Pli_20109_g1,Pli_1340_g1,Pli_8792_g1,Pli_5019_g1,Pli_1218_g1,Pli_5798_g1,Pli_3512_g1,Pli_19365_g1,Pli_4247_g2,Pli_12608_g1,Pli_19235_g1,Pli_9149_g1,Pli_19800_g1,Pli_7765_g1,Pli_22082_g1,Pli_2664_g1,Pli_7119_g1,Pli_22471_g1,Pli_3438_g1,Pli_17250_g1,Pli_…
Organismal Systems	Immune system	Hematopoietic cell lineage	ko04640	8	Pli_20432_g1,Pli_17170_g1,Pli_11197_g1,Pli_9596_g1,Pli_11622_g1,Pli_17767_g1,Pli_3009_g1,Pli_20788_g1
Organismal Systems	Immune system	Intestinal immune network for IgA production	ko04672	6	Pli_9596_g1,Pli_16640_g1,Pli_6096_g1,Pli_6919_g1,Pli_18778_g1,Pli_19640_g1
Organismal Systems	Immune system	Leukocyte transendothelial migration	ko04670	46	Pli_6414_g1,Pli_11096_g1,Pli_14466_g1,Pli_12544_g1,Pli_11606_g1,Pli_4439_g3,Pli_7780_g1,Pli_16476_g1,Pli_18525_g1,Pli_1856_g1,Pli_10259_g1,Pli_6789_g1,Pli_4439_g2,Pli_9734_g1,Pli_6789_g2,Pli_17098_g1,Pli_22045_g1,Pli_2407_g1,Pli_8477_g1,Pli_1595_g1,Pli_724_g1,Pli_277_g1,Pli_6789_g3,Pli_14413_g1,Pli_8013_g1,Pli_20445_g1,Pli_19800_g1,Pli_4439_g1,Pli_9643_g1,Pli_22503_g1,Pli_14100_g1,Pli_17371_g1,Pl…
Organismal Systems	Immune system	NOD-like receptor signaling pathway	ko04621	40	Pli_2120_g2,Pli_12149_g1,Pli_13286_g1,Pli_12608_g1,Pli_6376_g1,Pli_6286_g1,Pli_7417_g1,Pli_16417_g1,Pli_5798_g1,Pli_1218_g1,Pli_5019_g1,Pli_10619_g1,Pli_195_g1,Pli_18657_g1,Pli_17985_g1,Pli_2144_g1,Pli_8733_g1,Pli_22386_g1,Pli_1194_g1,Pli_7615_g1,Pli_2120_g1,Pli_12559_g1,Pli_2522_g1,Pli_20995_g1,Pli_13911_g1,Pli_10663_g1,Pli_6240_g1,Pli_16764_g1,Pli_2762_g1,Pli_9484_g1,Pli_19128_g1,Pli_12518_g1,P…
Organismal Systems	Immune system	Natural killer cell mediated cytotoxicity	ko04650	45	Pli_12518_g1,Pli_18520_g1,Pli_4962_g1,Pli_10259_g1,Pli_6240_g1,Pli_9596_g1,Pli_12559_g1,Pli_6414_g1,Pli_2522_g1,Pli_7558_g1,Pli_18353_g1,Pli_2407_g1,Pli_10443_g1,Pli_2721_g1,Pli_1637_g1,Pli_1218_g1,Pli_5019_g1,Pli_5798_g1,Pli_14896_g1,Pli_11527_g1,Pli_6376_g1,Pli_4247_g2,Pli_6286_g1,Pli_7088_g1,Pli_19857_g1,Pli_6970_g1,Pli_12608_g1,Pli_19800_g1,Pli_1756_g1,Pli_19267_g1,Pli_9620_g1,Pli_14430_g1,Pl…
Organismal Systems	Immune system	RIG-I-like receptor signaling pathway	ko04622	14	Pli_18892_g1,Pli_13911_g1,Pli_2548_g1,Pli_10663_g1,Pli_10619_g1,Pli_16764_g1,Pli_10882_g1,Pli_3593_g1,Pli_19246_g1,Pli_20756_g1,Pli_2264_g1,Pli_9523_g1,Pli_19678_g1,Pli_3268_g1
Organismal Systems	Immune system	T cell receptor signaling pathway	ko04660	61	Pli_10443_g1,Pli_11622_g1,Pli_1266_g1,Pli_7558_g1,Pli_538_g1,Pli_18353_g1,Pli_21402_g1,Pli_3296_g1,Pli_17098_g1,Pli_2721_g1,Pli_1637_g1,Pli_504_g1,Pli_1340_g1,Pli_10259_g1,Pli_4962_g1,Pli_7272_g1,Pli_19678_g1,Pli_12518_g1,Pli_9523_g1,Pli_12559_g1,Pli_6414_g1,Pli_2522_g1,Pli_13911_g1,Pli_10663_g1,Pli_16764_g1,Pli_6240_g1,Pli_1856_g1,Pli_612_g1,Pli_22471_g1,Pli_7615_g1,Pli_22468_g1,Pli_2664_g1,Pli_…
Organismal Systems	Immune system	Toll-like receptor signaling pathway	ko04620	43	Pli_538_g1,Pli_1266_g1,Pli_1340_g1,Pli_504_g1,Pli_1637_g1,Pli_11553_g1,Pli_3296_g1,Pli_1289_g1,Pli_4325_g1,Pli_10541_g1,Pli_19678_g1,Pli_9523_g1,Pli_12518_g1,Pli_10259_g1,Pli_6240_g1,Pli_16764_g1,Pli_10663_g1,Pli_13911_g1,Pli_2522_g1,Pli_12559_g1,Pli_6414_g1,Pli_21728_g1,Pli_17690_g1,Pli_7765_g1,Pli_7615_g1,Pli_22471_g1,Pli_612_g1,Pli_19053_g1,Pli_12075_g1,Pli_1194_g1,Pli_2144_g1,Pli_17985_g1,Pli…
Organismal Systems	Nervous system	Cholinergic synapse	ko04725	62	Pli_14430_g1,Pli_7765_g1,Pli_17690_g1,Pli_5645_g2,Pli_21728_g1,Pli_1914_g1,Pli_269_g1,Pli_612_g1,Pli_22471_g1,Pli_15559_g1,Pli_7615_g1,Pli_17708_g1,Pli_1194_g1,Pli_22524_g1,Pli_20978_g1,Pli_19053_g1,Pli_18646_g1,Pli_17985_g1,Pli_2020_g1,Pli_2144_g1,Pli_3303_g1,Pli_18916_g1,Pli_16429_g1,Pli_5019_g1,Pli_1218_g1,Pli_5798_g1,Pli_6376_g1,Pli_6286_g1,Pli_17514_g1,Pli_18867_g1,Pli_20896_g1,Pli_12608_g1,…
Organismal Systems	Nervous system	Dopaminergic synapse	ko04728	71	Pli_9005_g1,Pli_16429_g1,Pli_21126_g1,Pli_18916_g1,Pli_6055_g1,Pli_3303_g1,Pli_17883_g1,Pli_6680_g1,Pli_15663_g1,Pli_1914_g1,Pli_269_g1,Pli_17690_g1,Pli_612_g1,Pli_3367_g1,Pli_2026_g1,Pli_12241_g1,Pli_2020_g1,Pli_7272_g1,Pli_2033_g1,Pli_22545_g1,Pli_897_g1,Pli_11346_g1,Pli_7574_g1,Pli_4454_g1,Pli_12286_g1,Pli_170_g1,Pli_8520_g1,Pli_1266_g1,Pli_13690_g1,Pli_504_g1,Pli_20192_g1,Pli_3647_g1,Pli_1893…
Organismal Systems	Nervous system	GABAergic synapse	ko04727	31	Pli_269_g1,Pli_1914_g1,Pli_15148_g1,Pli_2493_g1,Pli_13690_g1,Pli_11826_g1,Pli_5345_g1,Pli_12165_g1,Pli_18646_g1,Pli_20978_g1,Pli_4439_g2,Pli_17254_g1,Pli_8624_g1,Pli_21066_g1,Pli_16429_g1,Pli_18916_g1,Pli_684_g1,Pli_897_g1,Pli_3303_g1,Pli_11346_g1,Pli_18867_g1,Pli_3359_g1,Pli_4682_g2,Pli_5167_g1,Pli_4454_g1,Pli_4439_g3,Pli_14369_g1,Pli_8709_g1,Pli_15663_g1,Pli_4439_g1,Pli_1178_g1
Organismal Systems	Nervous system	Glutamatergic synapse	ko04724	50	Pli_12570_g1,Pli_17254_g1,Pli_2144_g1,Pli_17985_g1,Pli_20978_g1,Pli_1194_g1,Pli_18646_g1,Pli_10990_g1,Pli_5257_g1,Pli_20000_g1,Pli_7615_g1,Pli_269_g1,Pli_1914_g1,Pli_15663_g1,Pli_4439_g1,Pli_6970_g1,Pli_12608_g1,Pli_6376_g1,Pli_405_g1,Pli_6286_g1,Pli_3303_g1,Pli_684_g1,Pli_18916_g1,Pli_19437_g1,Pli_16429_g1,Pli_5798_g1,Pli_1218_g1,Pli_5019_g1,Pli_6270_g1,Pli_3111_g1,Pli_8624_g1,Pli_4439_g2,Pli_20…
Organismal Systems	Nervous system	Long-term depression	ko04730	39	Pli_12608_g1,Pli_4439_g1,Pli_10083_g1,Pli_3303_g1,Pli_19437_g1,Pli_5019_g1,Pli_1218_g1,Pli_5798_g1,Pli_6055_g1,Pli_6376_g1,Pli_405_g1,Pli_6286_g1,Pli_1194_g1,Pli_19053_g1,Pli_17985_g1,Pli_12241_g1,Pli_2144_g1,Pli_7765_g1,Pli_21728_g1,Pli_1914_g1,Pli_1845_g1,Pli_7615_g1,Pli_6240_g1,Pli_12213_g1,Pli_4439_g3,Pli_2522_g1,Pli_12559_g1,Pli_16592_g1,Pli_12518_g1,Pli_18520_g1,Pli_20192_g1,Pli_2721_g1,Pli…
Organismal Systems	Nervous system	Long-term potentiation	ko04720	63	Pli_16702_g1,Pli_833_g1,Pli_2144_g1,Pli_17985_g1,Pli_1194_g1,Pli_2026_g1,Pli_17810_g1,Pli_18646_g1,Pli_19053_g1,Pli_13777_g1,Pli_15559_g1,Pli_7615_g1,Pli_17708_g1,Pli_7765_g1,Pli_21728_g1,Pli_269_g1,Pli_9729_g1,Pli_15663_g1,Pli_20445_g1,Pli_6970_g1,Pli_12608_g1,Pli_6376_g1,Pli_17514_g1,Pli_6286_g1,Pli_21197_g1,Pli_1218_g1,Pli_5019_g1,Pli_5798_g1,Pli_16429_g1,Pli_18916_g1,Pli_21126_g1,Pli_7621_g1,…
Organismal Systems	Nervous system	Neurotrophin signaling pathway	ko04722	88	Pli_2026_g1,Pli_22499_g1,Pli_19246_g1,Pli_19053_g1,Pli_1227_g1,Pli_2144_g1,Pli_2020_g1,Pli_17985_g1,Pli_21728_g1,Pli_18941_g1,Pli_17690_g1,Pli_612_g1,Pli_7615_g1,Pli_909_g1,Pli_20445_g1,Pli_7621_g1,Pli_14896_g1,Pli_6376_g1,Pli_6679_g2,Pli_6286_g1,Pli_11553_g1,Pli_2721_g1,Pli_504_g1,Pli_1637_g1,Pli_1289_g1,Pli_18938_g1,Pli_3647_g1,Pli_3296_g1,Pli_10227_g1,Pli_4368_g1,Pli_8520_g1,Pli_7230_g1,Pli_45…
Organismal Systems	Nervous system	Retrograde endocannabinoid signaling	ko04723	38	Pli_15663_g1,Pli_4439_g1,Pli_12608_g1,Pli_6376_g1,Pli_18867_g1,Pli_6286_g1,Pli_3303_g1,Pli_16429_g1,Pli_1218_g1,Pli_18916_g1,Pli_5798_g1,Pli_5019_g1,Pli_2144_g1,Pli_17985_g1,Pli_20978_g1,Pli_1194_g1,Pli_18646_g1,Pli_7615_g1,Pli_269_g1,Pli_1914_g1,Pli_12559_g1,Pli_2522_g1,Pli_6240_g1,Pli_4439_g3,Pli_4454_g1,Pli_4682_g2,Pli_11346_g1,Pli_897_g1,Pli_12518_g1,Pli_21066_g1,Pli_8624_g1,Pli_3111_g1,Pli_4…
Organismal Systems	Nervous system	Serotonergic synapse	ko04726	44	Pli_7615_g1,Pli_7765_g1,Pli_1914_g1,Pli_21728_g1,Pli_269_g1,Pli_17985_g1,Pli_2144_g1,Pli_20978_g1,Pli_1194_g1,Pli_19053_g1,Pli_18646_g1,Pli_6376_g1,Pli_405_g1,Pli_18867_g1,Pli_6286_g1,Pli_3303_g1,Pli_16429_g1,Pli_19437_g1,Pli_1218_g1,Pli_5019_g1,Pli_5798_g1,Pli_18916_g1,Pli_4439_g1,Pli_15663_g1,Pli_12608_g1,Pli_11826_g1,Pli_13690_g1,Pli_2493_g1,Pli_4439_g2,Pli_3111_g1,Pli_8624_g1,Pli_2721_g1,Pli_…
Organismal Systems	Nervous system	Synaptic vesicle cycle	ko04721	25	Pli_21836_g1,Pli_1914_g1,Pli_12846_g1,Pli_9856_g1,Pli_10919_g1,Pli_15767_g1,Pli_14817_g1,Pli_11826_g1,Pli_13846_g1,Pli_1247_g1,Pli_15077_g1,Pli_11603_g1,Pli_7647_g1,Pli_1937_g2,Pli_5315_g1,Pli_21066_g1,Pli_4076_g1,Pli_6841_g1,Pli_18867_g1,Pli_15621_g1,Pli_12881_g1,Pli_5167_g1,Pli_9310_g1,Pli_14986_g1,Pli_1937_g1
Organismal Systems	Sensory system	Inflammatory mediator regulation of TRP channels	ko04750	32	Pli_4454_g1,Pli_6414_g1,Pli_22545_g1,Pli_3828_g1,Pli_10259_g1,Pli_7574_g1,Pli_12165_g1,Pli_8624_g1,Pli_3111_g1,Pli_3647_g1,Pli_18938_g1,Pli_8520_g1,Pli_717_g1,Pli_12286_g1,Pli_9729_g1,Pli_15663_g1,Pli_16429_g1,Pli_21126_g1,Pli_19437_g1,Pli_405_g1,Pli_17514_g1,Pli_21197_g1,Pli_2026_g1,Pli_17810_g1,Pli_15126_g1,Pli_18646_g1,Pli_16702_g1,Pli_269_g1,Pli_13777_g1,Pli_15559_g1,Pli_17708_g1,Pli_11399_g1
Organismal Systems	Sensory system	Olfactory transduction	ko04740	21	Pli_3647_g1,Pli_18938_g1,Pli_8624_g1,Pli_12165_g1,Pli_18646_g1,Pli_21989_g1,Pli_2026_g1,Pli_17708_g1,Pli_15559_g1,Pli_13777_g1,Pli_269_g1,Pli_14076_g1,Pli_717_g1,Pli_8520_g1,Pli_15663_g1,Pli_4454_g1,Pli_12213_g1,Pli_21197_g1,Pli_17514_g1,Pli_16429_g1,Pli_16592_g1
Organismal Systems	Sensory system	Phototransduction	ko04744	9	Pli_897_g1,Pli_717_g1,Pli_2493_g1,Pli_21197_g1,Pli_13777_g1,Pli_2026_g1,Pli_3647_g1,Pli_18938_g1,Pli_21683_g1
Organismal Systems	Sensory system	Phototransduction - fly	ko04745	25	Pli_6789_g3,Pli_717_g1,Pli_8520_g1,Pli_1595_g1,Pli_15559_g1,Pli_17708_g1,Pli_5257_g1,Pli_20000_g1,Pli_13777_g1,Pli_21227_g1,Pli_10990_g1,Pli_12936_g1,Pli_2026_g1,Pli_6789_g2,Pli_3647_g1,Pli_13150_g1,Pli_18938_g1,Pli_3111_g1,Pli_6789_g1,Pli_10017_g1,Pli_14274_g1,Pli_21197_g1,Pli_17514_g1,Pli_19772_g1,Pli_9643_g1
Organismal Systems	Sensory system	Taste transduction	ko04742	15	Pli_2493_g1,Pli_897_g1,Pli_269_g1,Pli_1914_g1,Pli_16429_g1,Pli_19437_g1,Pli_405_g1,Pli_11826_g1,Pli_18867_g1,Pli_20978_g1,Pli_18646_g1,Pli_12165_g1,Pli_4454_g1,Pli_8624_g1,Pli_15663_g1
