# Supplementary material for: Transcriptome analysis of Phytophthora litchii reveals pathogenicity arsenals and confirms taxonomic status
Source: PLoS One. 2017 Jun 1;12(6):e0178245. doi: 10.1371/journal.pone.0178245 (PMC5453482; doi:10.1371/journal.pone.0178245)
Supplement: S2 Table — (XLSX) [file pone.0178245.s002.xlsx]

## Sheet: S2 Table
	S2 Table. Canonical and variant RXLR-dEER motifs and the WY-domain found in transcriptome of P. litchii
	aGene ID	Protein length	bSignalP S score	bSignalP start	cRXLR motif	RXLR start	cddEER motif	dEER start	ceWY-domain	WY-domain start	WY-domain end	WY-domain E-value	WY-domain Score	fEvidence
	Pli_10697_g1	215	0.869	13	RHLR	35	DNEER	47	2015-02-02	156	204	3.5e-20	58	BHM
	Pli_8137_g1	266	0.551	15	RFLR	48	EER	60	2015-02-03	163	210	2.4e-15	42.6	BHM
	Pli_7982_g1	203	0.85	14	RNLR	49	DEDDEER	62	2015-01-03	79	126	4e-15	41.9	HM
	Pli_11215_g1	121	0.836	4	RALR	47	NEENEER	61	2015-01-01	82	121	1e-14	40.6	M
	Pli_1778_g1	235	0.497	27	RLLR	63	DDK	95	2015-01-01	170	216	1.3e-11	30.7	HM
	Pli_7537_g1	223	0.533	15	RLLR	48	DEER	62	2015-01-03	77	127	2e-11	30.1	HM
	Pli_9922_g1	202	0.917	3	RSLR	36	NDEER	44	2015-01-05	52	98	6e-10	25.4	BM
	Pli_4883_g2	201	0.705	11	RLLR	49	DDEER	59	2015-02-02	170	201	6e-09	22.2	BHM
	Pli_3238_g1	141	0.934	12	RYLR	49	DEER	59	2015-01-02	75	112	4.2e-08	19.5	BM
	Pli_20311_g1	250	0.886	12	RLLR	50	NEER	63	2015-02-02	192	237	1.9e-07	17.4	HM
	Pli_14927_g1	110	0.831	2	RFLR	49	EDENEER	62	2015-02-02	80	108	2.5e-07	17	HM
	Pli_13224_g1	151	0.959	12	RFLR	57	ENEER	82	2015-01-01	108	151	6.2e-07	15.7	BHM
	Pli_15992_g1	163	0.536	29	RLLR	73	EDR	86	2015-01-01	95	143	1.8e-06	14.3	BM
	Pli_4523_g1	293	0.856	11	RLLR	40	DDDDEER	55	2015-01-03	87	125	2.6e-06	13.8	HM
	Pli_13977_g1	137	0.827	4	RLLR	45	EDEER	58	2015-02-02	86	128	2.8e-06	13.7	HM
	Pli_4842_g1	142	0.86	4	RILR	51	DEEER	81	2015-01-01	89	123	3.2e-06	13.5	HM
	Pli_21433_g1	118	0.944	9	RSLR	39	EDR	64	2015-01-01	68	115	8.5e-06	12.1	BM
	Pli_5743_g3	217	0.867	3	RQLR	36	QEER	46	-	-	-	-	-	HM
	Pli_21753_g1	90	0.659	26	RSLR	40	QDEER	56	-	-	-	-	-	BHM
	Pli_22127_g1	81	0.749	4	RHLR	24	QDEER	37	-	-	-	-	-	BHM
	Pli_2670_g1	139	0.883	12	RHLR	50	NNEER	61	-	-	-	-	-	BM
	Pli_36_g1	200	0.655	31	RFLR	75	NNEER	88	-	-	-	-	-	HM
	Pli_5484_g1	297	0.506	30	RSLR	70	NEER	91	-	-	-	-	-	BM
	Pli_11590_g1	129	0.944	10	RHLR	45	NEER	56	-	-	-	-	-	M
	Pli_11756_g1	146	0.897	19	RFLR	55	NEER	74	-	-	-	-	-	HM
	Pli_19089_g1	77	0.763	25	RLLR	59	NDNDEER	69	-	-	-	-	-	HM
	Pli_18364_g1	100	0.858	15	RLLR	42	NDEER	56	-	-	-	-	-	M
	Pli_485_g1	111	0.932	11	RSLR	53	EER	73	-	-	-	-	-	HM
	Pli_18240_g1	150	0.874	20	RNLR	56	EER	66	-	-	-	-	-	BM
	Pli_9981_g1	78	0.694	24	RLLR	64	EER	74	-	-	-	-	-	HM
	Pli_21666_g1	113	0.761	17	RLLR	46	EER	59	-	-	-	-	-	HM
	Pli_8866_g1	138	0.883	11	RLLR	39	EER	56	-	-	-	-	-	BM
	Pli_17789_g1	109	0.531	12	RFLR	51	EER	65	-	-	-	-	-	BHM
	Pli_16082_g1	93	0.752	16	RFLR	41	EER	52	-	-	-	-	-	HM
	Pli_5080_g1	124	0.775	9	RFLR	63	EER	85	-	-	-	-	-	HM
	Pli_10391_g1	90	0.862	1	RQLR	29	EEK	52	-	-	-	-	-	HM
	Pli_10004_g1	165	0.931	13	RVLR	42	EEER	59	-	-	-	-	-	BM
	Pli_15912_g1	109	0.68	24	RSLR	40	EEER	56	-	-	-	-	-	BHM
	Pli_7573_g1	197	0.572	34	RMLR	71	EEER	84	-	-	-	-	-	HM
	Pli_18757_g1	91	0.775	10	RSLR	47	EDNEER	74	-	-	-	-	-	HM
	Pli_13253_g1	84	0.881	10	RFLR	55	EDEDEDR	71	-	-	-	-	-	M
	Pli_12109_g1	84	0.695	1	RVLR	49	DNEER	61	-	-	-	-	-	HM
	Pli_3276_g1	1016	0.858	8	RPLR	127	DEK	144	-	-	-	-	-	M
	Pli_12649_g1	155	0.785	4	RYLR	48	DEER	75	-	-	-	-	-	M
	Pli_13713_g1	133	0.811	12	RSLR	59	DEER	79	-	-	-	-	-	HM
	Pli_21575_g1	113	0.91	11	RLLR	51	DEER	76	-	-	-	-	-	HM
	Pli_21151_g1	116	0.919	12	RLLR	49	DEER	64	-	-	-	-	-	HM
	Pli_22474_g1	79	0.781	3	RSLR	46	DEEER	69	-	-	-	-	-	HM
	Pli_19739_g1	94	0.73	10	RFLR	40	DEEER	53	-	-	-	-	-	BHM
	Pli_10318_g1	104	0.722	10	RFLR	51	DDEDR	68	-	-	-	-	-	HM
	Pli_12757_g1	138	0.875	11	-	-	ENK	125	2015-03-03	96	128	4.1e-06	13.1	B
	Pli_2350_g1	80	0.942	11	-	-	NDR	42	-	-	-	-	-	H
	Pli_11081_g1	88	0.808	3	-	-	EER	66	-	-	-	-	-	B
	Pli_645_g1	140	0.849	12	-	-	EER	57	-	-	-	-	-	B
	Pli_9093_g1	165	0.913	12	-	-	EDR	31	-	-	-	-	-	B
	Pli_15894_g1	102	0.747	4	-	-	-	-	-	-	-	-	-	B
	Pli_7948_g1	349	0.946	23	-	-	-	-	-	-	-	-	-	B
	Pli_2117_g1	535	-	-	RFLR	73	DER	84	2015-01-05	115	163	3.5e-22	64.4	B
	Pli_1894_g1	174	-	-	RQLR	61	NDEER	70	2015-01-03	1	40	1e-16	47	BH
	Pli_7009_g1	342	-	-	RLLR	57	ENDDER	70	2015-02-03	181	229	3.4e-15	42.1	BH
	Pli_4809_g1	153	-	-	RFLR	64	EDEER	75	2015-02-02	97	136	2e-07	17.3	H
	Pli_10494_g1	101	-	-	RLLR	45	NENDEER	55	2015-01-01	72	101	5.7e-07	15.9	H
	Pli_11331_g1	117	-	-	RFLR	32	DDNDEER	44	2015-01-01	65	111	3.3e-06	13.4	BH
	Pli_1680_g1	201	-	-	RHLR	72	ENEER	82	2015-01-02	133	169	3.6e-06	13.3	BH
	Pli_1549_g1	99	-	-	RFLR	70	EEER	90	-	-	-	-	-	H
	Pli_1580_g1	109	-	-	RFLR	16	DDDEER	43	-	-	-	-	-	H
	Pli_16288_g1	111	-	-	RFLR	74	EER	93	-	-	-	-	-	BH
	Pli_18578_g1	98	-	-	RFLR	56	EER	79	-	-	-	-	-	H
	Pli_20592_g1	167	-	-	RFLR	67	NEER	81	-	-	-	-	-	H
	Pli_7974_g1	103	-	-	RFLR	61	DEER	81	-	-	-	-	-	BH
	Pli_9026_g1	174	-	-	RFLR	78	DNNNDEER	92	-	-	-	-	-	H
	Pli_20828_g1	85	-	-	RHLR	56	DDEER	75	-	-	-	-	-	H
	Pli_4352_g1	165	-	-	RHLR	78	QDEER	91	-	-	-	-	-	BH
	Pli_19669_g1	154	-	-	RILR	93	EDEEDR	110	-	-	-	-	-	H
	Pli_21205_g1	154	-	-	RILR	54	NDDNEDR	75	-	-	-	-	-	H
	Pli_1059_g1	133	-	-	RLLR	57	EER	73	-	-	-	-	-	BH
	Pli_11675_g1	82	-	-	RLLR	57	EER	69	-	-	-	-	-	H
	Pli_16887_g1	112	-	-	RLLR	51	DDEER	64	-	-	-	-	-	BH
	Pli_19032_g1	95	-	-	RLLR	55	DDEER	72	-	-	-	-	-	H
	Pli_21512_g1	129	-	-	RLLR	66	EER	92	-	-	-	-	-	H
	Pli_3149_g1	188	-	-	RLLR	74	EER	87	-	-	-	-	-	BH
	Pli_6410_g1	174	-	-	RLLR	88	DEER	107	-	-	-	-	-	H
	Pli_21329_g1	178	-	-	RQLR	132	EER	140	-	-	-	-	-	H
	Pli_18336_g1	112	-	-	RRLR	43	EER	54	-	-	-	-	-	B
	Pli_12334_g1	95	-	-	RSLR	57	EER	79	-	-	-	-	-	H
	Pli_13133_g1	181	-	-	RSLR	76	EER	92	-	-	-	-	-	BH
	Pli_4139_g1	99	-	-	RSLR	59	DEER	78	-	-	-	-	-	H
	Pli_5254_g1	191	-	-	RSLR	61	EEER	89	-	-	-	-	-	H
	Pli_11353_g1	105	-	-	RYLR	17	EER	35	-	-	-	-	-	H
	Pli_18220_g1	172	-	-	-	-	EER	16	2015-01-03	46	67	3.6e-05	10.1	BH
	Pli_2993_g1	129	-	-	-	-	DENQEER	21	2015-02-02	71	116	2e-06	14.1	H
	Pli_3612_g1	109	-	-	-	-	QNR	55	2015-04-04	324	368	1.5e-08	20.9	B
	Pli_1076_g1	328	-	-	-	-	ENNER	178	2015-02-03	46	85	2.4e-11	29.8	B
	Pli_4883_g1	286	-	-	-	-	EDK	37	2015-03-04	148	196	5.1e-12	32	B
	Pli_17214_g1	80	-	-	-	-	EDK	1	2015-01-01	21	69	1.2e-13	37.2	B
	Pli_4788_g1	208	-	-	-	-	DQK	124	2015-02-03	68	116	5.4e-15	41.5	B
	Pli_13478_g1	131	-	-	-	-	EQR	27	2015-01-02	21	69	4.1e-19	54.6	B
	Pli_8712_g1	181	-	-	-	-	NDK	68	2015-01-02	16	64	2.3e-22	65	B
	Pli_7953_g1	874	-	-	-	-	DDK	18	-	-	-	-	-	H
	Pli_10926_g1	216	-	-	-	-	DENK	157	-	-	-	-	-	B
	Pli_12508_g1	91	-	-	-	-	DNR	17	-	-	-	-	-	B
	Pli_520_g1	97	-	-	-	-	EDNK	80	-	-	-	-	-	B
	Pli_3342_g1	384	-	-	-	-	EDNNEER	147	-	-	-	-	-	B
	Pli_18940_g1	343	-	-	-	-	EEK	6	-	-	-	-	-	B
	Pli_2626_g1	207	-	-	-	-	EER	78	-	-	-	-	-	B
	Pli_8623_g1	132	-	-	-	-	EER	7	-	-	-	-	-	B
	Pli_2781_g1	809	-	-	-	-	NQR	223	-	-	-	-	-	B
	Pli_17197_g1	79	-	-	-	-	-	-	2015-01-01	30	78	4.3e-22	64.1	B
	Pli_11966_g1	68	-	-	-	-	-	-	2015-02-02	25	67	8.3e-21	60	B
	Pli_18020_g1	134	-	-	-	-	-	-	2015-02-02	81	129	1.4e-20	59.2	B
	Pli_14093_g1	160	-	-	-	-	-	-	2015-01-03	76	124	3.9e-20	57.8	BH
	Pli_11739_g1	140	-	-	-	-	-	-	2015-01-02	1	40	5.6e-18	51	B
	Pli_18664_g1	282	-	-	-	-	-	-	2015-01-04	37	86	6.4e-16	44.4	B
	Pli_18875_g1	91	-	-	-	-	-	-	2015-02-03	181	229	1e-14	40.6	B
	Pli_13301_g1	99	-	-	-	-	-	-	2015-01-02	1	38	9.2e-14	37.5	B
	Pli_13926_g1	116	-	-	-	-	-	-	2015-01-02	1	31	1.7e-11	30.3	B
	Pli_18579_g1	178	-	-	-	-	-	-	2015-01-01	121	169	7.5e-10	25.1	B
	Pli_19001_g1	170	-	-	-	-	-	-	2015-03-04	121	145	2.9e-09	23.2	B
	Pli_9589_g1	72	-	-	-	-	-	-	2015-02-03	25	56	5e-09	22.4	B
	Pli_19170_g1	71	-	-	-	-	-	-	2015-01-02	5	46	7.3e-09	21.9	B
	Pli_7468_g1	65	-	-	-	-	-	-	2015-01-01	5	53	2.7e-06	13.7	B
	Pli_13589_g1	79	-	-	-	-	-	-	-	-	-	-	-	B
	Pli_15688_g1	114	-	-	-	-	-	-	-	-	-	-	-	B
	Pli_16208_g1	112	-	-	-	-	-	-	-	-	-	-	-	B
	Pli_17280_g1	97	-	-	-	-	-	-	-	-	-	-	-	B
	Pli_19498_g1	71	-	-	-	-	-	-	-	-	-	-	-	B
	Pli_21643_g1	88	-	-	-	-	-	-	-	-	-	-	-	B
	Pli_7946_g1	115	-	-	-	-	-	-	-	-	-	-	-	B
	a Effectors were predicted from the gene sequences by blastx, hmmsearch and Regex method.
	b SignalP S score and signal peptide length were predicted using SignalP v4.1.
	c All sequence coordinates are refer to peptide sequences.
	d Determined as two or more D,E,N and/or Q residues followed by a R or K residue: [DENQ]{2,}[RK].
	e WY-domain was predicted using the HMM with positive score. The numerator refer to the highest score one among the total predicted WY-domain( denominator).
	f Evidence codes for RXLR gene prediction: B (Blastx comparison),H(hmmsearch),M (Regex scan within the P. litchii secretome ).
	The “-” means that no related domain was predicted
